1  
2  
3  
4  
5  
6  
7  
8  
9  
10  
11  
12  
13  
14  
15  
16  
17  
18  
19  
20  
21  
22  
23

**VARIANT ANALYSIS PIPELINE FOR ACCURATE DETECTION OF GENOMIC  
VARIANTS FROM TRANSCRIPTOME SEQUENCING DATA.**

**SNP CALLING FROM RNA-SEQ DATA IN NON-HUMAN MODELS**

Modupe O. Adetunji<sup>1\*</sup>, Carl J. Schmidt<sup>1</sup>, Susan J. Lamont<sup>2¶</sup>, Behnam Abasht<sup>1¶</sup>

<sup>1</sup>Department of Animal and Food Sciences, University of Delaware, Newark, DE 19716, USA.

<sup>2</sup>Department of Animal Science, Iowa State University, Ames, Iowa 50011-3150 USA

\* Corresponding author

Email : [amodupe@udel.edu](mailto:amodupe@udel.edu) (MOA)

¶ These authors contributed equally to this work.

## 24 **Abstract**

25           The wealth of information deliverable from transcriptome sequencing (RNA-seq) is  
26 significant, however current applications for variant detection still remain a challenge due to the  
27 complexity of the transcriptome. Given the ability of RNA-seq to reveal active regions of the  
28 genome, detection of RNA-seq SNPs can prove valuable in understanding the phenotypic diversity  
29 between populations. Thus, we present a novel computational workflow named VAP (Variant  
30 Analysis Pipeline) that takes advantage of multiple RNA-seq splice aware aligners to call SNPs in  
31 non-human models using RNA-seq data only. We applied VAP to RNA-seq from a highly inbred  
32 chicken line and achieved >97% precision and >99% sensitivity when compared with the matching  
33 whole genome sequencing (WGS) data. Over 65% of WGS coding variants were identified from  
34 RNA-seq. Further, our results discovered SNPs resulting from post translational modifications,  
35 such as RNA editing, which may reveal potentially functional variation that would have otherwise  
36 been missed in genomic data. Even with the limitation in detecting variants in expressed regions  
37 only, our method proves to be a reliable alternative for SNP identification using RNA-seq data.

38

## 39 **Introduction**

40           Detection of single nucleotide polymorphisms (SNPs) is an important step in  
41 understanding the relationship between genotype and phenotype. The insights achieved with next

42 generation sequencing (NGS) technologies provide an unbiased view of the entire genome, exome  
43 or transcriptome at a reasonable cost (1). Most methods for variant identification utilize whole-  
44 genome or whole-exome sequencing data, while variant identification using RNA-seq remains a  
45 challenge because of the complexity in the transcriptome and the high false positive rates (2).  
46 However, having access to RNA sequences at a single nucleotide resolution provides the  
47 opportunity to investigate gene or transcript differences across species at a nucleotide level.

48 RNA-seq is applicable to numerous research studies, such as the quantification of gene  
49 expression levels, detection of alternative splicing, allele-specific expression, gene fusions or RNA  
50 editing (3). Workflows have been developed to address identifying SNPs from RNA-seq reads in  
51 human, including SNPiR and eSNV-detect. SNPiR (4) employs BWA aligner and variant calling  
52 using GATK UnifiedGenotyper, eSNV-detect (5) relies on combination of two aligners (BWA and  
53 TopHat2) followed by variant calling with SAMtools and Opposum + Platypus (6). Opposum  
54 reconstructs RNA alignment files to make them suitable for haplotype-based variant calling with  
55 Platypus (7). These workflows require adequate sampling of RNA-seq reads and accurate mapping  
56 of the RNA-seq reads to the reference genome to avoid false positive SNP calls. In addition to the  
57 limitation of these workflows being specifically designed for human samples, they either rely on  
58 outdated variant calling procedures, or preprocessing RNA-seq data to make it suitable for variant  
59 calling, thus making it difficult to sufficiently compare their performance.

60 Due to the aforementioned limitations, we designed a workflow, called VAP (Variant  
61 Analysis Pipeline), to reliably identify SNPs in RNA-seq in non-human models. VAP takes into  
62 consideration current state-of-the-art RNA-seq mapping, variant calling algorithms and the GATK  
63 best practices recommended by the Broad Institute (8). Our workflow consists of (i) multiple  
64 splice-aware reference-mapping algorithms that make use of the transcripts annotation data, (ii)

65 variant calling following the Genome Analysis Toolkit (GATK) best practices, and (iii) stringent  
66 filtering procedures. We propose that calculating specificity will estimate the likelihood of  
67 detecting a true variant in RNA-seq and sensitivity will determine how likely RNA-seq is able to  
68 detect an expressed SNP if it is present in a transcribed gene (9). Overall the results indicate that  
69 RNA-seq can be an accurate method of SNP detection using our VAP workflow.

70

## 71 **Materials and methods**

### 72 **VAP Workflow**

73 Fig 1 shows the flowchart of the VAP workflow. Read quality was assessed using FastQC  
74 and preprocessed using Trimmomatic (10) and/or AfterQC (11) when required. Pre-processed  
75 RNA-seq reads were mapped to the reference genome and known transcripts employing three  
76 splice-aware assembly tools; TopHat2 (12), HiSAT2 (13) and STAR (14). All three programs are  
77 open-source and are highly recommended for reliable reference mapping of RNA-seq data (15).  
78 SAMtools was used to convert the alignment results to BAM format (16). The mapped reads  
79 undergo sorting, adding read groups, and marking of duplicates using Picard tools package  
80 (<https://broadinstitute.github.io/picard/>). The SNP calling step uses the GATK toolkit for splitting  
81 “N” cigar reads (i.e. splice junction reads), base quality score recalibration and variant detection  
82 using the GATK HaplotypeCaller (17). Lastly, the filtering steps entail assigning priority to SNPs  
83 found in all three mapping plus SNP calling steps, to minimize false positive variant calls. The

84 priority SNPs were filtered using the GATK Variant Filtration tool and custom Perl scripts. SNPs  
85 were filtered using the set of read characteristics summarized in Table 1; low quality calls (QD <  
86 5), or variants with strong strand bias (FS > 60), or low read depth (DP < 10) and SNP clusters (3  
87 SNPs in 35bp window) were excluded from further analysis. Custom filtering was described as  
88 follows: nucleotide positions with less than 5 reads supporting alternative allele and nucleotide  
89 positions with heterozygosity scores < 0.10 are eliminated to prevent ambiguous SNP calls.  
90 Alternative-allele ratio (*Het*) is calculated by  $Het_i = aa_i / t_i$ ; where *i* is the nucleotide base pair, *aa<sub>i</sub>*  
91 is the alternate read depth at the location *i*, and *t<sub>i</sub>* is the total number of reads at location *i*. After  
92 filtering, the variants were annotated using the ANNOVAR (18) and VEP (19) software.

93

94 **Fig 1. Flow chart of the VAP workflow.** FastQ files are QC using FastQC, mapped using three  
95 aligners. BAM files are pre-processed by Picard and GATK, then merged, annotated and filtered  
96 to achieve high-confident SNPs.

97

98 **Table 1. Criteria used in the VAP filtering workflow.**

| Criteria                         | Threshold      |
|----------------------------------|----------------|
| GATK - VariantFiltration tool    |                |
| ReadRankPosSum (RRPS)            | RRPS < -8      |
| Quality by depth (QD)            | QD < 5         |
| Read depth (DP)                  | DP < 10        |
| Fisher's exact test p-value (FS) | FS > 60        |
| Mapping Quality (MQ)             | MQ < 40        |
| SnpCluster                       | 3 SNPs in 35bp |

|                                          |                    |
|------------------------------------------|--------------------|
| Mann-Whitney Rank-Sum (MQRankSum)        | MQRankSum < -12.5  |
| Alternative allele supporting read depth | ALTreads < 5       |
| Alternative allele ratio ( <i>Het</i> )  | $aa / t \leq 0.10$ |

99

## 100 **DNA and RNA Sequencing data**

101 We obtained RNA-seq and whole genome sequencing (WGS) data for highly inbred  
102 Fayoumi chickens from previously published works. For RNA-seq, samples were collected from  
103 the brain and liver generating of 2 chicken embryos at day 12, generating 117 million 75bp pair-  
104 end reads (Zhuo et al., 2017; the NCBI Sequence Read Archive Accession number SRP102082)  
105 (20). For WGS, pooled DNA samples were constructed from individual DNA isolates from blood  
106 from 16 birds, contributing to 241 million 100bp pair-end reads (Fleming et al., 2016; the NCBI  
107 Sequence Read Archive Accession number SRP192622) (21). Both samples were sequenced on  
108 the Illumina HiSeq platform. The transcriptome and whole genome of these samples have been  
109 deeply sequenced to provide sufficient coverage for accurate identification of variants from RNA  
110 and DNA of the same line. Having matched RNA and DNA samples allows for suitable  
111 verification of RNA SNP calls, making our datasets good candidates for evaluating the accuracy  
112 of our VAP methodology.

113

## 114 **600K Genotyping data**

115 Samples were genotypes individually and included 96 samples from two purebred (23  
116 samples) and one crossbred (73 samples) commercial broiler populations. The samples were

117 genotyped with the ThermoFisher Axiom Chicken Genotyping Array (22). The raw genotyping  
118 data (cel files) was analyzed with the *Gallus gallus* 5.0 genome (from Axiom server) using the  
119 Axiom Analysis Suite Software (version 3.0.1) following the software's Best Practices Workflow  
120 using recommended settings for agricultural animals. The final results were exported, including a  
121 raw VCF of all the genotype calls and a *txt* file of all variants with  $\geq 97\%$  call rate. The *txt* file  
122 was utilized to filter low quality variants from the raw VCF.

123

## 124 **RNA-seq Mapping, Variant Calling and Filtering**

125 RNA-seq samples were mapped with the three RNA-seq mapping tools; TopHat2 (v 2.1.1),  
126 HiSAT2 (v 2.1.0) and STAR (v 2.5.2b) 2-pass method using default parameters to the NCBI *Gallus*  
127 *gallus* Build 5.0 reference genome and the mapping files were converted to BAM using SAMtools  
128 (v 1.4.1). The BAM files were processed, and variants were called using Picard tools (v 2.13.2)  
129 and GATK (v 3.8-0-ge9d806836) through the VAP pipeline. We used ANNOVAR (v 2017Jul16)  
130 and VEP (v 91) to annotate variants on the basis of gene model from RefSeq, Ensembl and the  
131 UCSC Genome Browser. We retained SNPs found with all three mapping tools and those that  
132 fulfilled the filtering criteria in Table 1. SNPs found in WGS data or present in dbSNP (Build 150)  
133 are identified as “verified” variants, while those not found are tagged as “novel”. The precision of  
134 the VAP workflow was determined as the number of all known RNA-seq variants divided by the  
135 total number of known and novel RNA-seq variants, i.e.  $\text{Precision} = \text{verified}_{\text{SNPs}} / (\text{verified}_{\text{SNPs}} +$   
136  $\text{novel}_{\text{SNPs}})$ .

137

## 138 **WGS Mapping, Variant Calling and Filtering**

139 We mapped the WGS data with BWA-mem (v 0.7.16a-r1181) (23) using default  
140 parameters to the NCBI *Gallus gallus* Build 5.0 reference genome. Variant calling was performed  
141 using Picard and GATK HaplotypeCaller, following the recommendations proposed by Van der  
142 Auwera et al (24) and Yiyuan Yan et al (25). Similar filtering parameters for RNA-seq as  
143 previously described were applied using the GATK Variant Filtration tool and custom scripts  
144 (Table 1). To allow a fair comparison between RNA-seq and WGS variants, we estimated  
145 specificity with the fraction of coding exonic variants identified from WGS.

146

## 147 **Sensitivity and Specificity of Verified RNA-seq SNPs**

148 To determine the accuracy of detecting a true variant from RNA-seq using our VAP  
149 workflow, we calculated the specificity and sensitivity of the verified RNA-seq SNPs. Because we  
150 are using transcriptome data, we should only be theoretically able to detect SNPs at sites expressed  
151 in our data. Sensitivity analysis will evaluate the accuracy of our pipeline to correctly detect known  
152 SNPs using RNA-seq, and specificity analysis will assess how likely a SNP is detected by RNA-  
153 seq compared to WGS. To do this, we further characterized our verified RNA-seq SNPs as “true-  
154 verified” and “non-verified” SNPs. A true-verified SNP (TS) is a SNP with the same  
155 corresponding dbSNP and/or WGS data, and a non-verified SNP (NS) is where the genotype does  
156 not match the dbSNP/WGS data. Also, SNPs not detected in RNA-seq but found in WGS and  
157 validated using dbSNP are called “DNA-verified” SNPs (DS). Sensitivity is calculated as the  
158 number of TS divided by the number of TS plus the number of PS (i.e. Sensitivity =  $TS / (TS +$   
159  $NS)$ ). While specificity is estimated as the number of TS divided by the number of TS plus the  
160 number of DS (i.e. Specificity =  $TS / (TS + DS)$ ) (4,9).



161

## 162 **Gene Expression Analysis**

163 Variants in expressed regions were identified by gene quantification analysis using  
164 StringTie v1.3.3 (26) on the TopHat2, HISAT2 and STAR BAM files. The average FPKM  
165 (fragments per kilobase of transcript per million fragments mapped) was calculated for specificity  
166 analysis.

167

## 168 **RESULTS**

### 169 **The Multi-Aligner Concept**

170 VAP uses a multi-aligner concept to call SNPs confidently. The application of multiple  
171 aligners reduces false discovery rates significantly, as shown in the eSNV-detect pipeline (5,27).  
172 However, we do not assign a confidence hierarchy on candidate SNP calls, rather SNP detected  
173 from all three aligners are weighted equally, thus all consensus SNPs are obtained and filtered  
174 based on the filtering criteria listed above. High percentages of similar SNPs were observed  
175 between all three tools, which shows that using a splice-aware read mapper is appropriate for  
176 reference mapping using RNA-seq, unlike with BWA. Table 2 provides the summary of mapping  
177 and variant calling statistics from the multiple aligners.

178

179 **Table 2. Summary from the multiple aligners; read mapping statistics and variant calls.**

| <b>Tools</b> | <b>% reads mapped</b> | <b>% reference covered</b> | <b>Variants</b> | <b>SNPs</b> | <b>% similar SNPs</b> |
|--------------|-----------------------|----------------------------|-----------------|-------------|-----------------------|
| TopHat       | 87.7                  | 23.07                      | 578655          | 535505      | 96.12                 |
| HiSAT        | 90.53                 | 23.44                      | 636948          | 583547      | 88.21                 |
| STAR         | 87.81                 | 23.7                       | 798696          | 708391      | 72.66                 |

180

## 181 **SNPs detected in RNA-seq data.**

182 Our method identified 514,729 SNPs from all 3 aligners before filtering, which assures  
183 reduction of false positives calls (Fig 2). After filtering, 282,798 (54.9%) high confidence SNPs  
184 remain, of which 97.2% (274,777 SNPs) were supported by evidence from WGS or dbSNP v.150  
185 (Fig 3). The verified sites exhibited a transition-to-transversion (ts/tv) ratio of 2.84 and estimated  
186 ts/tv ratio of ~5 for exonic regions and thus a good indicator of genomic conservation in transcribed  
187 regions. For the remaining (novel) 8,021 SNPs, we observed slightly lower ts/tv ratio (2.81) than  
188 for the verified sites. The variant sites showed a clear enrichment of transitions, inclusive of A>G  
189 and T>C mutations (73.9%), indicative of mRNA editing and the dominant A-to-I RNA editing  
190 (28) (Fig 4).

191

192 **Fig 2. Comparison of RNA-seq SNPs Identified in the different mapping tools.**

193 **Fig 3. Comparison of RNA-seq SNPs found in either dbSNP or WGS.**

194 **Fig 4. The mutational profile of RNA-seq variants.**

195

## 196 **SNPs Allele Frequencies**

197           The 282,798 SNPs called, were grouped based on their variant allele frequencies  
198 (VAF). VAFs were calculated by dividing the number of reads supporting the variant allele by  
199 the total number of reads obtained. SNPs were grouped as homozygous to the alternative allele  
200 with  $VAF \geq 0.99$ , and heterozygous with  $VAF < 0.99$ . We found 264,790 (93.6%) and 18,008  
201 (6.4%) SNPs were classified as homozygous alternate and heterozygous, respectively. Not  
202 surprisingly, most of the predicted SNPs were homozygous to the non-reference allele, suggesting  
203 the large genetic difference of the Fayoumi breed compared to the reference genome *Gallus gallus*  
204 (Red Jungle Fowl) is influenced by polymorphisms (29,30). This will aid in identifying the  
205 genomic regions/loci enriched by selection.

206

## 207 **Precision and Sensitivity of RNA-seq SNPs**

208           A high proportion of SNPs detected in RNA-seq data are true variants. The sensitivity of  
209 SNP calls are similar for both heterozygous and homozygous sites (Fig 5). With the high number  
210 of calls verified via dbSNP, the precision is much higher for homozygous variants compared to  
211 heterozygous variants, indicating that a high proportion of expected variants can be detected using  
212 RNA-seq with adequate coverage. The decreased precision in heterozygous SNPs may suggest  
213 expression of the non-reference allele, and this provides the opportunity to study the effects of  
214 genetic variation on the different transcriptional events, such as RNA editing, alternate splicing  
215 and allelic specific expression, which cannot be explained using DNA sequencing data (31).

216

217 **Fig 5. Comparison of SNPs identified as homozygous and heterozygous in RNA-seq.**

218

## 219 **Functional classification of RNA-seq and WGS variants**

220 Thirteen percent of the RNA-seq SNPs were predicted to be within protein-coding regions  
 221 while >1% of the WGS SNPs were in coding regions when annotated against both the NCBI and  
 222 ENSEMBL gene database for chicken; the remaining SNPs were found in non-coding or  
 223 regulatory regions (Table 3). Due to difficulty in annotating and determining the impact of  
 224 polymorphisms on non-coding or regulatory regions, only polymorphisms found on coding regions  
 225 were further evaluated.

226

227 **Table 3. SNPs belonging to different annotation categories.**

|            | <b>Annotation categories</b> | <b>Number (%)</b> | <b>Mean VAF (<math>\pm</math> SD)</b> | <b>No. homozygous (VAF <math>\geq</math> 0.99) <sup>a</sup></b> |
|------------|------------------------------|-------------------|---------------------------------------|-----------------------------------------------------------------|
| <b>RNA</b> | Intergenic                   | 162240 (57)       | 0.99 (0.06)                           | 152732 (94%)                                                    |
|            | Up/downstream                | 11793 (4)         | 0.99 (0.07)                           | 10817 (92%)                                                     |
|            | Intronic                     | 58028 (20)        | 0.99 (0.05)                           | 55744 (96%)                                                     |
|            | Exonic                       | 36702 (13)        | 0.99 (0.08)                           | 33051 (90%)                                                     |
|            | Non-synonymous               | 8599 (3)          | 0.98 (0.11)                           | 7664 (89%)                                                      |
|            | Synonymous                   | 28094 (10)        | 0.99 (0.07)                           | 25353 (90%)                                                     |
|            | Stop-gain/loss               | 39 (<1)           | 0.96 (0.16)                           | 34 (87%)                                                        |

|                                          |                |              |             |               |
|------------------------------------------|----------------|--------------|-------------|---------------|
|                                          | Splicing       | 8 (<1)       | 1 (0)       | 8 (100%)      |
|                                          | UTR3/UTR5      | 13421 (5)    | 0.98 (0.09) | 11895 (88%)   |
|                                          | ncRNA          | 106 (<1)     | 0.97 (0.13) | 100 (94%)     |
| <b>WGS</b>                               | Intergenic     | 2865498 (82) | 0.99 (0.07) | 2659382 (92%) |
|                                          | Up/downstream  | 30741 (<1)   | 0.99 (0.08) | 28558 (93%)   |
|                                          | Intronic       | 565323 (16)  | 0.99 (0.07) | 522577 (92%)  |
|                                          | Exonic         | 34294 (1)    | 0.98 (0.09) | 31875 (92%)   |
|                                          | Non-synonymous | 8946 (<1)    | 0.97 (0.11) | 8283 (86%)    |
|                                          | Synonymous     | 25274 (<1)   | 0.99 (0.08) | 23526 (93%)   |
|                                          | Stop-gain/loss | 74 (<1)      | 0.98 (0.11) | 66 (69%)      |
|                                          | Splicing       | 17 (<1)      | 0.97 (0.13) | 17 (100%)     |
|                                          | UTR3/UTR5      | 12476 (<1)   | 0.99 (0.07) | 11515 (92%)   |
|                                          | ncRNA          | 302 (<1)     | 0.99 (0.07) | 277 (91%)     |
| <b>Overlap RNA &amp; WGS<sup>b</sup></b> | Intergenic     | 125218 (58)  | 1 (0.04)    | 112462 (89%)  |
|                                          | Up/downstream  | 9787 (4)     | 0.99 (0.04) | 6908 (87%)    |
|                                          | Intronic       | 47894 (22)   | 1 (0.04)    | 43636 (91%)   |
|                                          | Exonic         | 22551 (10)   | 0.99 (0.05) | 19533 (87%)   |
|                                          | Non-synonymous | 5165 (2)     | 0.99 (0.06) | 4486 (87%)    |
|                                          | Synonymous     | 17363 (8)    | 0.99 (0.05) | 15030 (86%)   |

|  |                |          |             |            |
|--|----------------|----------|-------------|------------|
|  | Stop-gain/loss | 23 (<1)  | 1 (0.01)    | 17 (39%)   |
|  | Splicing       | 5 (<1)   | 1 (0)       | 5 (100%)   |
|  | UTR3/UTR5      | 9943 (5) | 0.99 (0.04) | 8475 (85%) |
|  | ncRNA          | 73 (<1)  | 0.99 (0.03) | 63 (86%)   |

228 <sup>a</sup> The percentages are in relation to the number of SNPs within the annotation category.

229 <sup>b</sup> The percentages are in relation to the number of SNPs within the annotation category in RNA.

230

## 231 **Specificity of RNA-seq SNPs**

232 To calculate specificity of our VAP methodology, we focused on variants in coding regions  
233 to allow for fair comparison between RNA-seq and WGS data. Approximately 66% of the coding  
234 variants identified by WGS were discovered using RNA-seq alone (Fig 6). Given that RNA-seq  
235 required less sequencing effort and computational requirements (e.g. 234 million for RNA-seq  
236 compared to the 482 million for WGS sequencing reads used in our case study). Using RNA-seq  
237 data is advantageous because it enriches for expressed genic regions compared to WGS and  
238 therefore will increase the power to detect functionally important SNPs impacting protein  
239 sequence.

240

241 **Fig 6. Overlap of SNPs found in coding regions from RNA-seq and WGS.** 66% of the coding  
242 variants identified in WGS data were found in RNA-seq. However, the remaining WGS coding  
243 variants were not detected as a result of either: lack of expression/transcription (“no  
244 transcription”), the position was homozygous in RNA (“no variation”), “found but filtered”

245 signifying that the position was detected but removed by one of our filtering steps, or “filtered”  
246 which indicates the position was heterozygous but filtered because it didn’t meet the default  
247 parameters for variant detection.

248

249 We then compared the RNA-seq SNPs in expressed genes (having FPKM > 0.1), and the  
250 specificity increased from 66% to over 82% (Fig 7). This shows that a large fraction of genes are  
251 expressed at very low levels (Fig 8). Overall the results prove our methodology can achieve high  
252 specificity for variant calling in expressed regions of the genome.

253

254 **Fig 7. Specificity and number of RNA-seq SNPs detected in relation to the genes expressed**  
255 **(FPKM values).**

256 **Fig 8. Distribution of expression levels for genes with RNA-seq SNPs.**

257

## 258 **Comparison of RNA-seq and 600k Genotyping Panel SNPs**

259 Given the high accuracy of genotyping arrays for SNP discovery, we compared our initially  
260 verified RNA-seq SNPs with the genotyped chromosomes identified in the 600k chicken  
261 genotyping panel (i.e. the autosomes (GGA1 – 33). A low percentage (10%) of our RNA-seq SNPs  
262 overlap with the 600k SNPs (Fig 9), which is largely due to the limitation in the number of variants  
263 the genotyping panel is able to capture across different samples. However, 99.9% of the  
264 genotyping SNPs were found in dbSNP, proving dbSNP is an adequate method for *in silico*  
265 verification of our RNA-seq SNPs.

266

267 **Fig 9. Comparison of SNP calls between 600k Genotyping panel, RNA-seq SNPs, WGS**  
268 **SNPs and dbSNP v150.** (a) all autosomal SNPs and (b) autosomal SNPs found in exons.

269

## 270 **RNA–DNA differences (RDD) sites**

271 As mentioned before, our RNA-seq SNPs were notably contributed from transitions which  
272 may be attributed to mRNA editing. Further classifications of the RNA-seq SNPs detected in exons  
273 reveal 34% of the exonic SNPs verified by dbSNP were not identified in our WGS data. The  
274 majority of the RNA SNPs were not found in WGS because of the mapping and filtering  
275 parameters as shown in Table 4. Interestingly, 24% of these SNPs were not found because the  
276 alternate nucleotide was not present in the DNA sequence potentially indicating RNA–DNA  
277 differences (RDD). Consequently, these RDD sites may result from post-transcriptional  
278 modification of the RNA sequence, such as RNA editing or alternative splicing.

279

280 **Table 4. Explanation for the 14,147 RNA SNPs not found in WGS data.**

| Reason for absence                                                                                                 | Number of SNPs (%) |
|--------------------------------------------------------------------------------------------------------------------|--------------------|
| Position was heterozygous in WGS but filtered because it didn't meet the default parameters for variant detection. | 1225 (8.7)         |
| No reads were mapped to region/position.                                                                           | 1693 (12)          |
| Position was homozygous in WGS                                                                                     | 3471 (24.5)        |
| Position was heterozygous in WGS but removed by our custom filtering pipeline                                      | 7758 (54.8)        |

281



282 RNA editing is the most prevalent form of post-transcriptional maturation processes that  
283 contributes to transcriptome diversity. It involves the modification of specific nucleotides in the  
284 RNA sequence without altering its template DNA (28,32). From our dataset, we identified the  
285 three non-synonymous RDD mutations on *CYFIP2*, *GRIA2* and *COG3* previously validated by  
286 Frésand et al. in chicken embryos(28) (Table 5). This demonstrates the VAP methodology ability  
287 to detect conserved RNA editing phenomena and that it can be used in further discovery of novel  
288 post-transcriptional editing events.

289

290 **Table 5. Potentially functional RDD Candidates found in Fayoumi.**

| CHROM  | POSITION  | DNA<br>NUCLEOTIDE | RDD<br>NUCLEOTIDE | AMINO<br>ACID<br>CHANGE | GENE<br>SHORT<br>NAME | VAF<br>SCORE |
|--------|-----------|-------------------|-------------------|-------------------------|-----------------------|--------------|
| chr 1  | 167798513 | A                 | G                 | I/V                     | COG3                  | 0.524        |
| chr 4  | 21653669  | A                 | G                 | R/G                     | GRIA2                 | 0.703        |
| chr 13 | 11398088  | T                 | C                 | K/E                     | CYFIP2                | 0.375        |

291

## 292 **DISCUSSION**

293 RNA-seq is instrumental in understanding the complexity of the transcriptome. Several  
294 methodologies have provided approaches to understanding the varied aspects occurring in the

295 transcriptome, but little has been done in its application to identifying variants in functional regions  
296 of the genome. To this aim, we designed the VAP workflow, a multi-aligner strategy using a  
297 combination of splice-aware RNA-seq reference mapping tools, variant identification using  
298 GATK, and subsequent filtering that allows accurate identification of genomic variants from  
299 transcriptome sequencing. Our results show very high precision, sensitivity and specificity, though  
300 limited to SNPs occurring in transcribed regions.

301         Considering the mapping phase of RNA-seq reads is a crucial step in variant calling, we  
302 devised a reference mapping strategy using three RNA-seq splice-aware aligners to reduce the  
303 prevalence of false positives. The use of the splice-aware aligner allows for accurate assembly of  
304 reads because it makes use of both the genome and transcriptome information simultaneously for  
305 read mapping.

306         The ability to call variants from RNA-seq has numerous applications. It enables validation  
307 of variants detected by genome sequencing. It also uncovers potential post-transcriptional  
308 modifications for gene regulation (Table 5) and allows for detection of previously unidentified  
309 variants that may be functionally important but difficult to capture using DNA sequencing or  
310 exome sequencing at lower cost. Although our WGS data was not sequenced from the same  
311 samples that gave rise to the RNA-seq data, this could explain the poor overlap in our datasets, for  
312 instance, 87.5% of RNA-seq variants in exons were not found in WGS though well characterized  
313 in dbSNP (Fig 6). Therefore, RNA variants can be used in identifying genetic markers for genetic  
314 mapping of traits of interest, thus offering a better understanding of the relationship between  
315 genotype and phenotype.

316         Our VAP methodology shows high precision in calling SNPs from RNA-seq data. It is  
317 however limited by the RNA-seq experiments; RNA SNPs are detected only on the transcripts

318 expressed. Regardless of comprehensive coverage, variant detection in some portions of the  
319 genome are not guaranteed by RNA-seq because of the potential lack of expression. Also, allele-  
320 specific gene expression or tissue-specific gene expression might hamper the discovery of genomic  
321 variants given that the allele carrying the variant might not be expressed or the tissues collected  
322 might not express the genes of interest.

323 SNP genotyping offers a highly accurate and alternative method of SNP discovery, and  
324 thus offers an additional *in silico* method of validation of our RNA-seq SNPs. However, a low  
325 overlap with the 600K chicken genotyping panel was observed (Fig 9). This low overlap is most  
326 likely due to the limitations in genotyping panels currently available for any given organism. The  
327 genotyping panels are limited by the number of variants they are able to capture across different  
328 genetic backgrounds (22). Not surprisingly, the majority of the 600K genotyping variants were  
329 also identified in dbSNP, proving that dbSNP an excellent choice for *in silico* validation.

330 Nevertheless, VAP allows the detection of variants even for lowly expressed genes. To  
331 obtain higher confidence in variant calls, pooling multiple data sets (i.e. RNA-seq from different  
332 tissues) can increase the coverage thereby facilitate variant discovery in regions of interest that  
333 would have otherwise been missed. Our study demonstrates that variants calling from RNA-seq  
334 experiments can tremendously benefit from an increased number of reads increasing the coverage  
335 of genomic regions especially for whole genome analysis; nevertheless even our small sample size  
336 allowed for reliable calling of variants and enriching for variants in exonic regions.

337 Despite the limitations of calling genomic variants from RNA-seq data, our work shows  
338 high sensitivity and specificity in SNP calls from RNA-seq data. SNP calling from RNA-seq will  
339 not replace WGS or exome-sequencing (WES) approaches but rather offers a suitable alternative  
340 to either approaches and might complement or be used to validate SNPs detected from either WGS

341 or WES. Overall, we present a valuable methodology that provides an avenue to analyze genomic  
342 SNPs from RNA-seq data alone.

343

## 344 **AUTHOR CONTRIBUTIONS**

345 M.O.A. designed the methodology, performed the data analysis and drafted the manuscript.  
346 C.J.S. secured the funding, advised in the research and revised the manuscript. S.J.L. and B.A.  
347 provided the data and revised the manuscript.

348

## 349 **REFERENCES**

- 350 1. Metzker ML. Sequencing technologies the next generation. Nat Rev Genet. Nature  
351 Publishing Group; 2010 Jan 8;11(1):31–46.
- 352 2. Guo Y, Zhao S, Sheng Q, Samuels DC, Shyr Y. The discrepancy among single nucleotide  
353 variants detected by DNA and RNA high throughput sequencing data. BMC Genomics.  
354 BioMed Central; 2017 Oct 3;18(S6):690.
- 355 3. Wang Z, Gerstein M, Snyder M. RNA-Seq: a revolutionary tool for transcriptomics. Nat  
356 Rev Genet [Internet]. Nature Publishing Group; 2009 Jan 1 [cited 2019 Apr 3];10(1):57–

- 357 63. Available from: <http://www.nature.com/articles/nrg2484>
- 358 4. Piskol R, Ramaswami G, Li JB. Reliable Identification of Genomic Variants from RNA-  
359 Seq Data. *Am J Hum Genet.* 2013;93(4):641–51.
- 360 5. Tang X, Baheti S, Shameer K, Thompson KJ, Wills Q, Niu N, et al. The eSNV-detect: a  
361 computational system to identify expressed single nucleotide variants from transcriptome  
362 sequencing data. *Nucleic Acids Res. Oxford University Press*; 2014 Dec 16;42(22):e172.
- 363 6. Oikkonen L, Lise S. Making the most of RNA-seq: Pre-processing sequencing data with  
364 Opossum for reliable SNP variant detection. *Wellcome open Res. The Wellcome Trust*;  
365 2017 Jan 17;2:6.
- 366 7. Rimmer A, Phan H, Mathieson I, Iqbal Z, Twigg SRF, Wilkie AOM, et al. Integrating  
367 mapping-, assembly- and haplotype-based approaches for calling variants in clinical  
368 sequencing applications. *Nat Genet.* 2014 Aug 13;46(8):912–8.
- 369 8. Castel SE, Levy-Moonshine A, Mohammadi P, Banks E, Lappalainen T. Tools and best  
370 practices for data processing in allelic expression analysis. *Genome Biol.* 2015  
371 Sep;16(1):195.
- 372 9. Quinn EM, Cormican P, Kenny EM, Hill M, Anney R, Gill M, et al. Development of  
373 Strategies for SNP Detection in RNA-Seq Data: Application to Lymphoblastoid Cell  
374 Lines and Evaluation Using 1000 Genomes Data. Futscher BW, editor. *PLoS One. Public*  
375 *Library of Science*; 2013 Mar 26;8(3):e58815.
- 376 10. Bolger AM, Lohse M, Usadel B. Trimmomatic: a flexible trimmer for Illumina sequence  
377 data. *Bioinformatics. Oxford University Press*; 2014 Aug 1;30(15):2114–20.
- 378 11. Chen S, Huang T, Zhou Y, Han Y, Xu M, Gu J. AfterQC: automatic filtering, trimming,  
379 error removing and quality control for fastq data. *BMC Bioinformatics.* 2017 Mar

- 380 14;18(S3):80.
- 381 12. Kim D, Pertea G, Trapnell C, Pimentel H, Kelley R, Salzberg SL, et al. TopHat2: accurate  
382 alignment of transcriptomes in the presence of insertions, deletions and gene fusions.  
383 Genome Biol. BioMed Central; 2013;14(4):R36.
- 384 13. Kim D, Langmead B, Salzberg SL. HISAT: a fast spliced aligner with low memory  
385 requirements. Nat Methods. Nature Research; 2015 Mar 9;12(4):357–60.
- 386 14. Dobin A, Davis CA, Schlesinger F, Drenkow J, Zaleski C, Jha S, et al. STAR: ultrafast  
387 universal RNA-seq aligner. Bioinformatics. Oxford University Press; 2013 Jan  
388 1;29(1):15–21.
- 389 15. Medina I, Tárraga J, Martínez H, Barrachina S, Castillo MI, Paschall J, et al. Highly  
390 sensitive and ultrafast read mapping for RNA-seq analysis. DNA Res. 2016;23(2):93–100.
- 391 16. Li H, Handsaker B, Wysoker A, Fennell T, Ruan J, Homer N, et al. The Sequence  
392 Alignment/Map format and SAMtools. Bioinformatics. Oxford University Press; 2009  
393 Aug 15;25(16):2078–9.
- 394 17. McKenna A, Hanna M, Banks E, Sivachenko A, Cibulskis K, Kernytsky A, et al. The  
395 Genome Analysis Toolkit: a MapReduce framework for analyzing next-generation DNA  
396 sequencing data. Genome Res. Cold Spring Harbor Laboratory Press; 2010  
397 Sep;20(9):1297–303.
- 398 18. Wang K, Li M, Hakonarson H. ANNOVAR: functional annotation of genetic variants  
399 from high-throughput sequencing data. Nucleic Acids Res. Oxford University Press; 2010  
400 Sep;38(16):e164.
- 401 19. McLaren W, Gil L, Hunt SE, Riat HS, Ritchie GRS, Thormann A, et al. The Ensembl  
402 Variant Effect Predictor. Genome Biol. BioMed Central; 2016 Dec 6;17(1):122.

- 403 20. Zhuo Z, Lamont SJ, Abasht B. RNA-Seq Analyses Identify Frequent Allele Specific  
404 Expression and No Evidence of Genomic Imprinting in Specific Embryonic Tissues of  
405 Chicken. *Sci Rep* [Internet]. Nature Publishing Group; 2017 Dec 20 [cited 2018 Feb  
406 6];7(1):11944. Available from: <http://www.nature.com/articles/s41598-017-12179-9>
- 407 21. Fleming DS, Koltjes JE, Fritz-Waters ER, Rothschild MF, Schmidt CJ, Ashwell CM, et al.  
408 Single nucleotide variant discovery of highly inbred Leghorn and Fayoumi chicken breeds  
409 using pooled whole genome resequencing data reveals insights into phenotype differences.  
410 *BMC Genomics* [Internet]. BioMed Central; 2016 Dec 19 [cited 2019 Jan 29];17(1):812.  
411 Available from: <http://www.ncbi.nlm.nih.gov/pubmed/27760519>
- 412 22. Kranis A, Gheyas AA, Boschiero C, Turner F, Yu L, Smith S, et al. Development of a  
413 high density 600K SNP genotyping array for chicken. *BMC Genomics*. BioMed Central;  
414 2013 Jan 28;14(1):59.
- 415 23. Li H. Aligning sequence reads, clone sequences and assembly contigs with BWA-MEM.  
416 2013 Mar 16 [cited 2019 Mar 1]; Available from: <http://arxiv.org/abs/1303.3997>
- 417 24. Van der Auwera GA, Carneiro MO, Hartl C, Poplin R, Del Angel G, Levy-Moonshine A,  
418 et al. From FastQ data to high confidence variant calls: the Genome Analysis Toolkit best  
419 practices pipeline. *Curr Protoc Bioinforma* [Internet]. 2013 Oct 15;43(1110):11.10.1-  
420 11.10.33. Available from: <https://www.ncbi.nlm.nih.gov/pubmed/25431634>
- 421 25. Yan Y, Yi G, Sun C, Qu L, Yang N. Genome-Wide Characterization of Insertion and  
422 Deletion Variation in Chicken Using Next Generation Sequencing. Wang J, editor. *PLoS*  
423 *One*. Public Library of Science; 2014 Aug 18;9(8):e104652.
- 424 26. Perteau M, Perteau GM, Antonescu CM, Chang T-C, Mendell JT, Salzberg SL. StringTie  
425 enables improved reconstruction of a transcriptome from RNA-seq reads. *Nat Biotechnol*

- 426 [Internet]. Nature Research; 2015 [cited 2017 Jan 11];33(3):290–5. Available from:  
427 <http://www.nature.com/articles/nbt.3122>
- 428 27. Kalari KR, Necela BM, Tang X, Thompson KJ, Lau M, Eckel-Passow JE, et al. An  
429 integrated model of the transcriptome of HER2-positive breast cancer. PLoS One. Public  
430 Library of Science; 2013;8(11):e79298.
- 431 28. Frésard L, Leroux S, Roux P-F, Klopp C, Fabre S, Esquerré D, et al. Genome-Wide  
432 Characterization of RNA Editing in Chicken Embryos Reveals Common Features among  
433 Vertebrates. Gibas C, editor. PLoS One. Public Library of Science; 2015 May  
434 29;10(5):e0126776.
- 435 29. Moiseyeva IG, Romanov MN, Nikiforov AA, Sevastyanova AA, Semyenova SK.  
436 Evolutionary relationships of Red Jungle Fowl and chicken breeds. Genet Sel Evol.  
437 BioMed Central; 2003 Jul 15;35(5):403.
- 438 30. Kumar V, Shukla SK, Mathew J, Sharma D. Genetic Diversity and Population Structure  
439 Analysis Between Indian Red Jungle Fowl and Domestic Chicken Using Microsatellite  
440 Markers. Anim Biotechnol. Taylor & Francis; 2015 Jul 3;26(3):201–10.
- 441 31. Han Y, Gao S, Muegge K, Zhang W, Zhou B. Advanced applications of RNA sequencing  
442 and challenges. Bioinform Biol Insights. SAGE Publications; 2015;9(Suppl 1):29–46.
- 443 32. Bakhtiarizadeh MR, Shafiei H, Salehi A. Large-scale RNA editing profiling in different  
444 adult chicken tissues. bioRxiv. Cold Spring Harbor Laboratory; 2018 May 11;319871.  
445



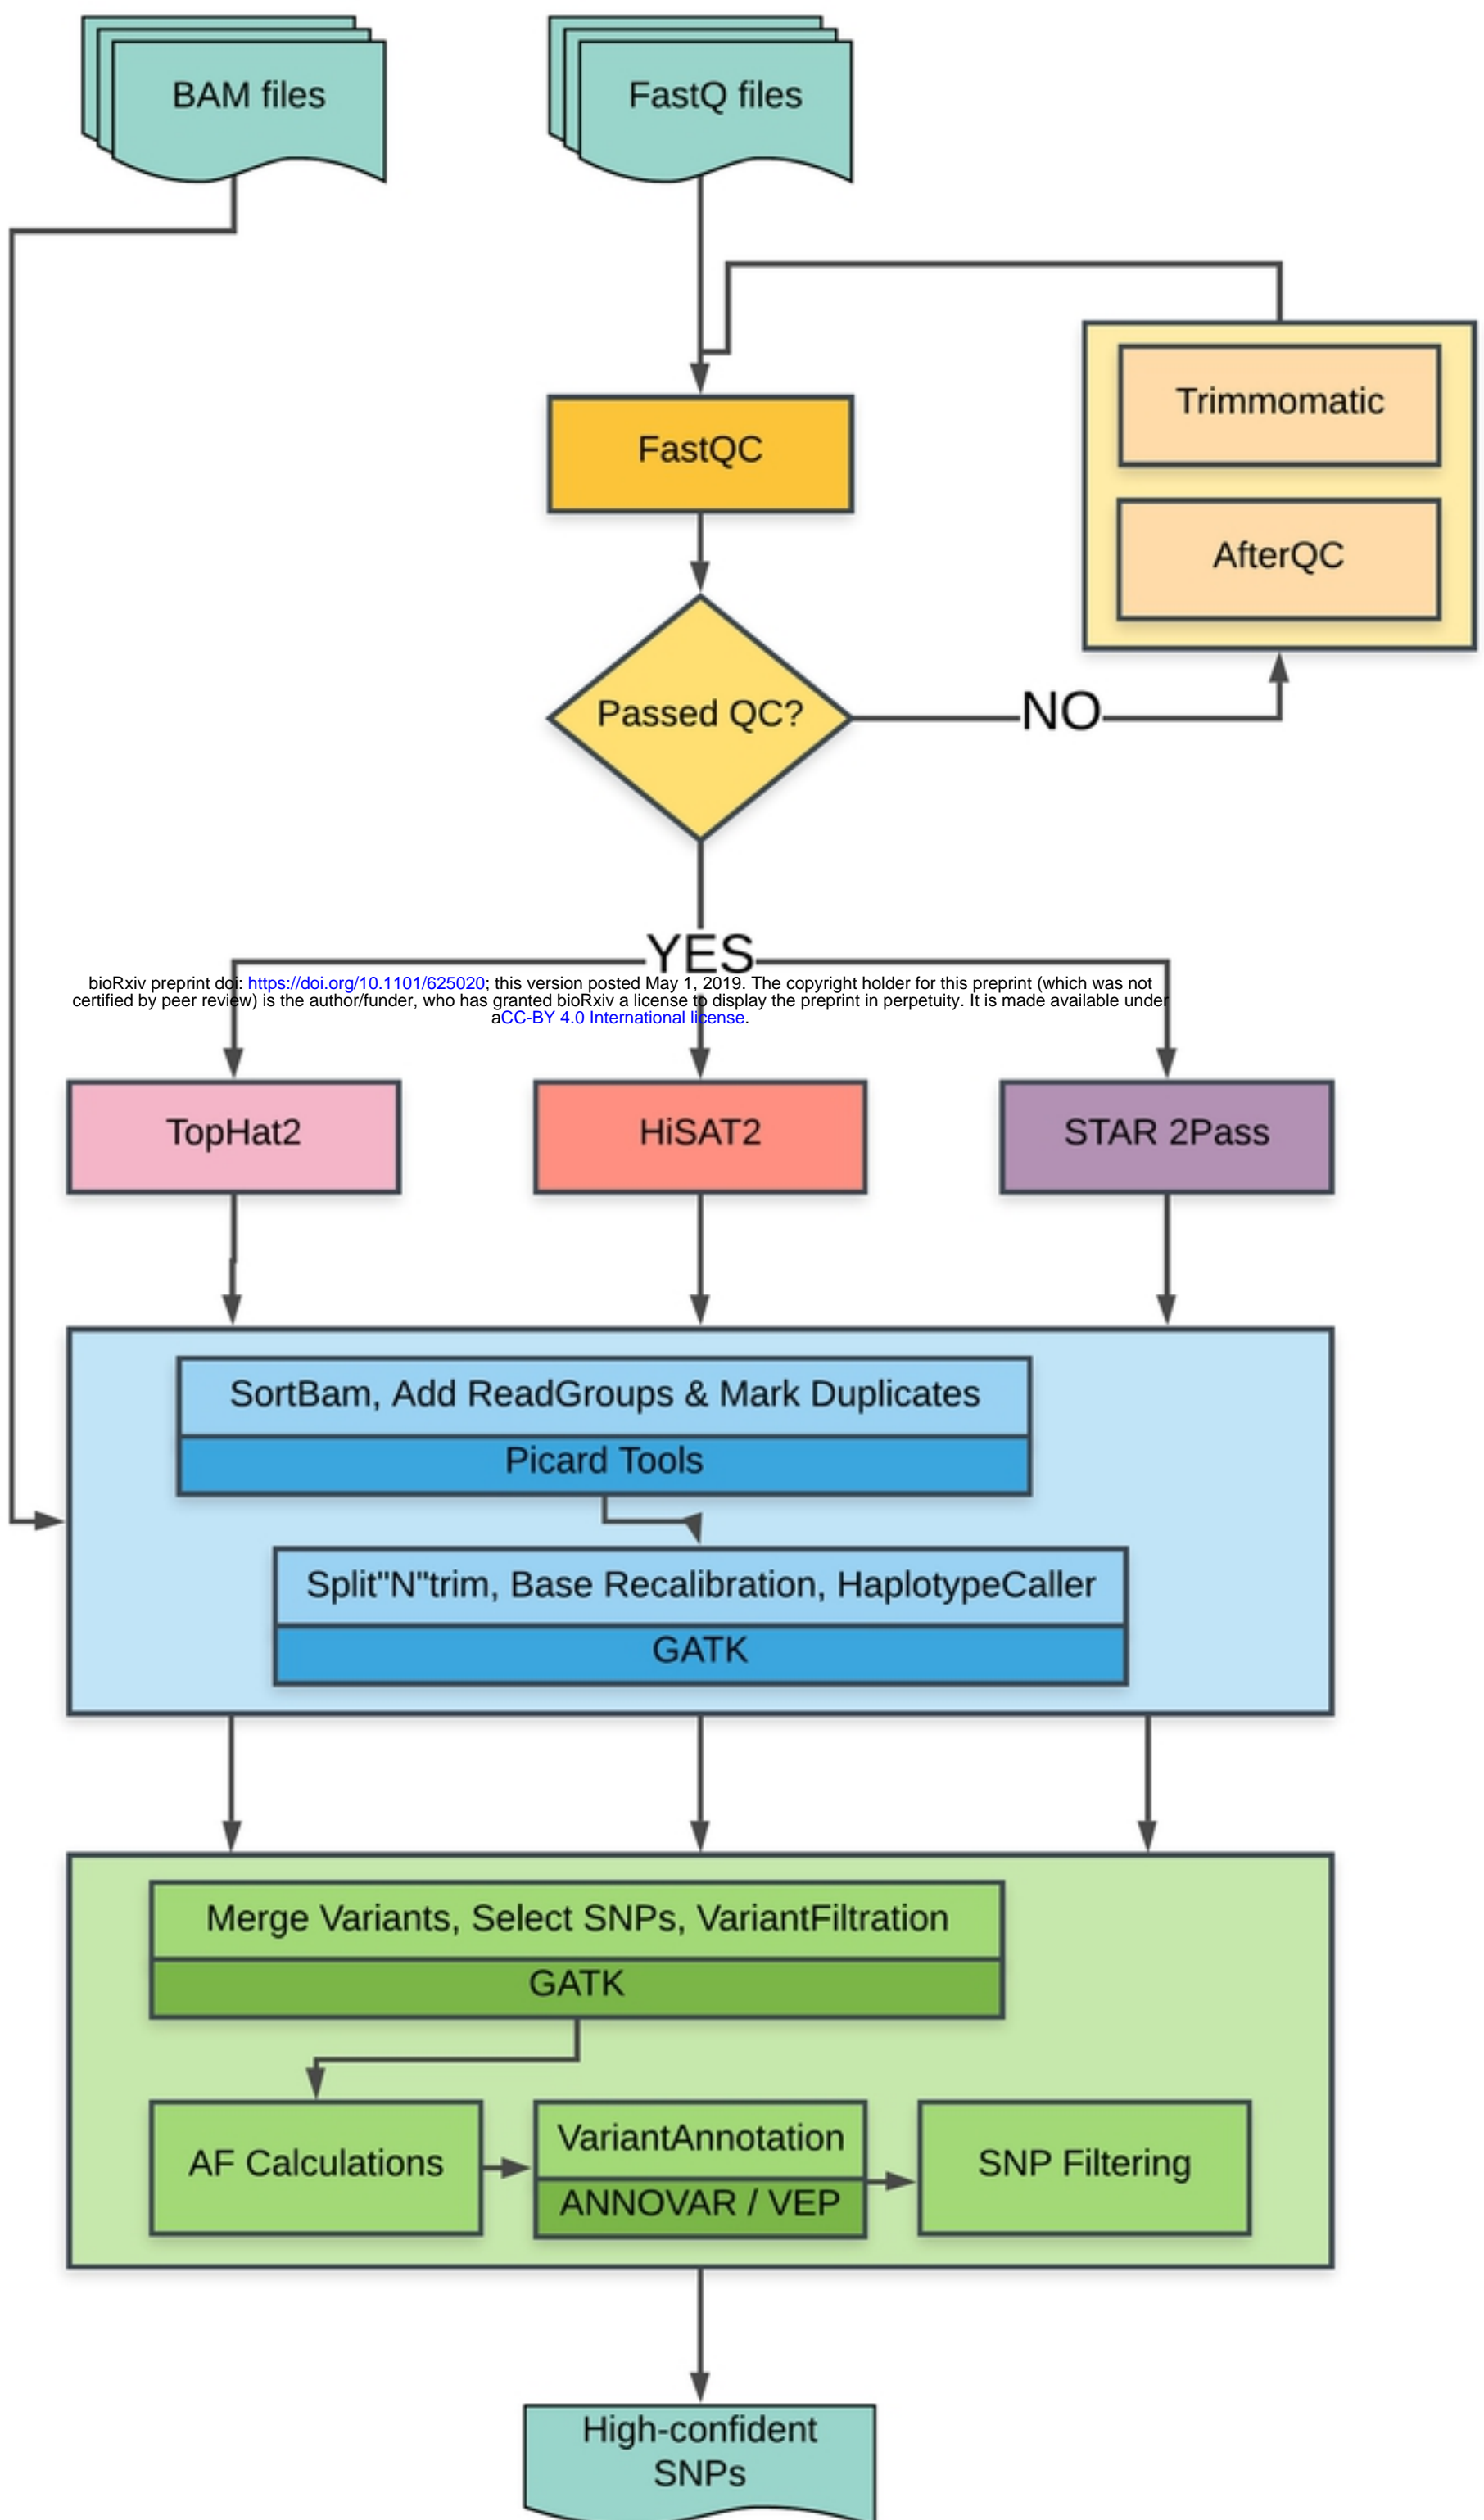

Fig 1

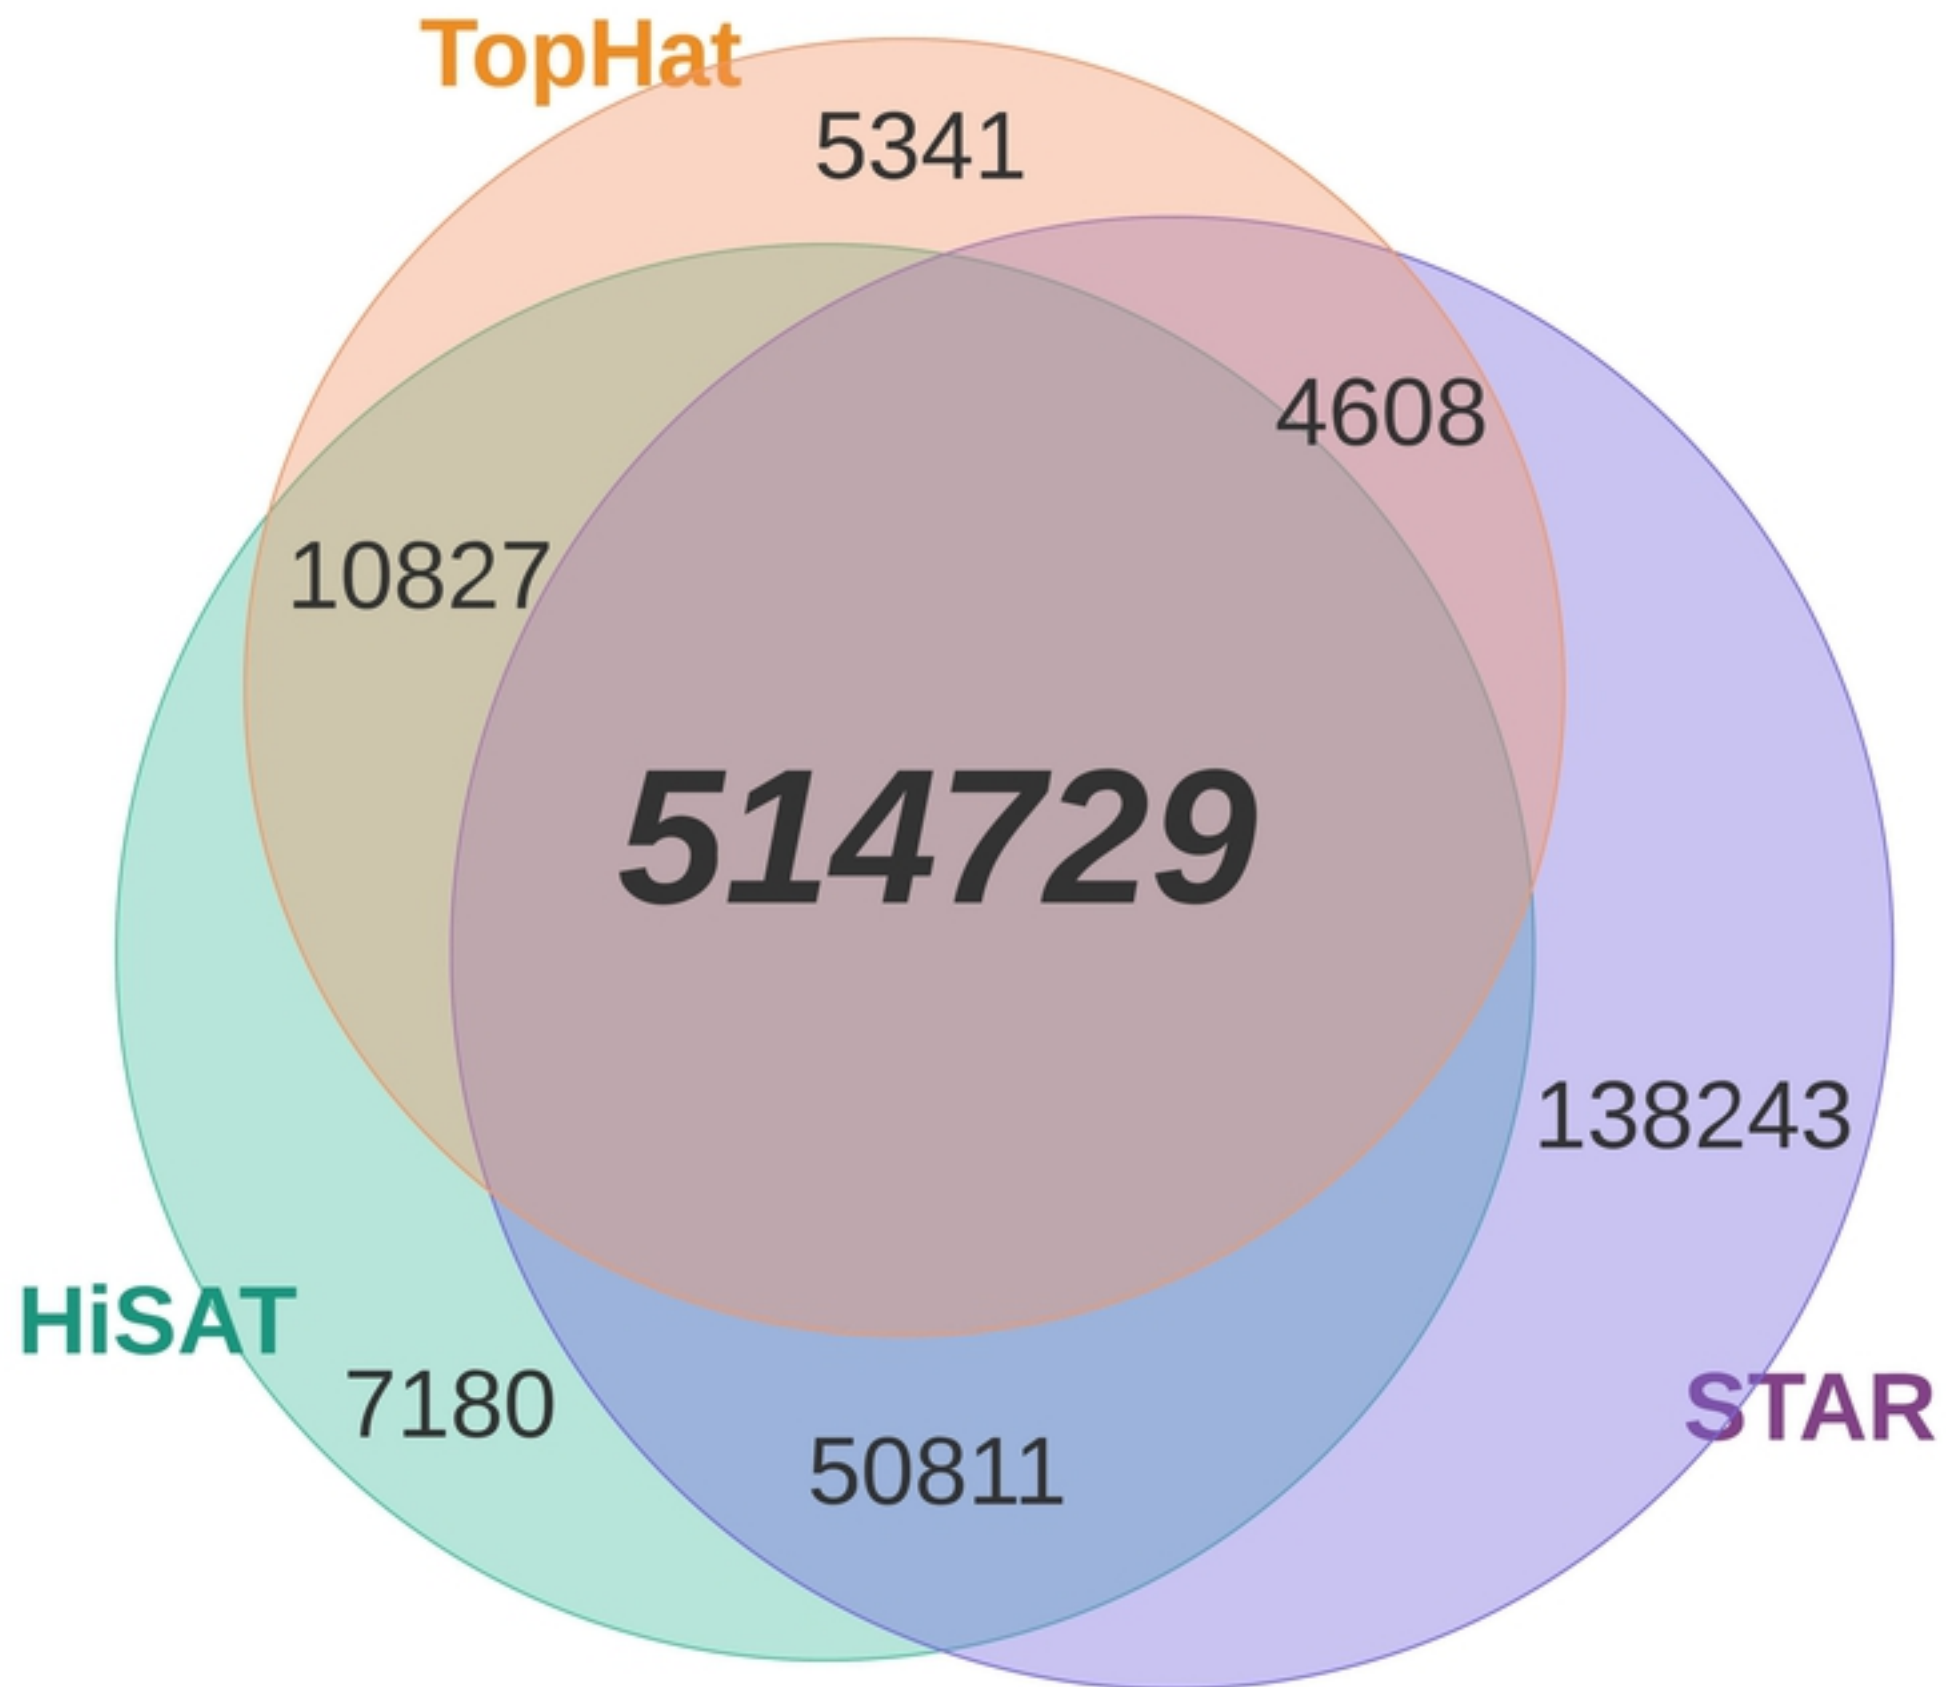

Fig 2

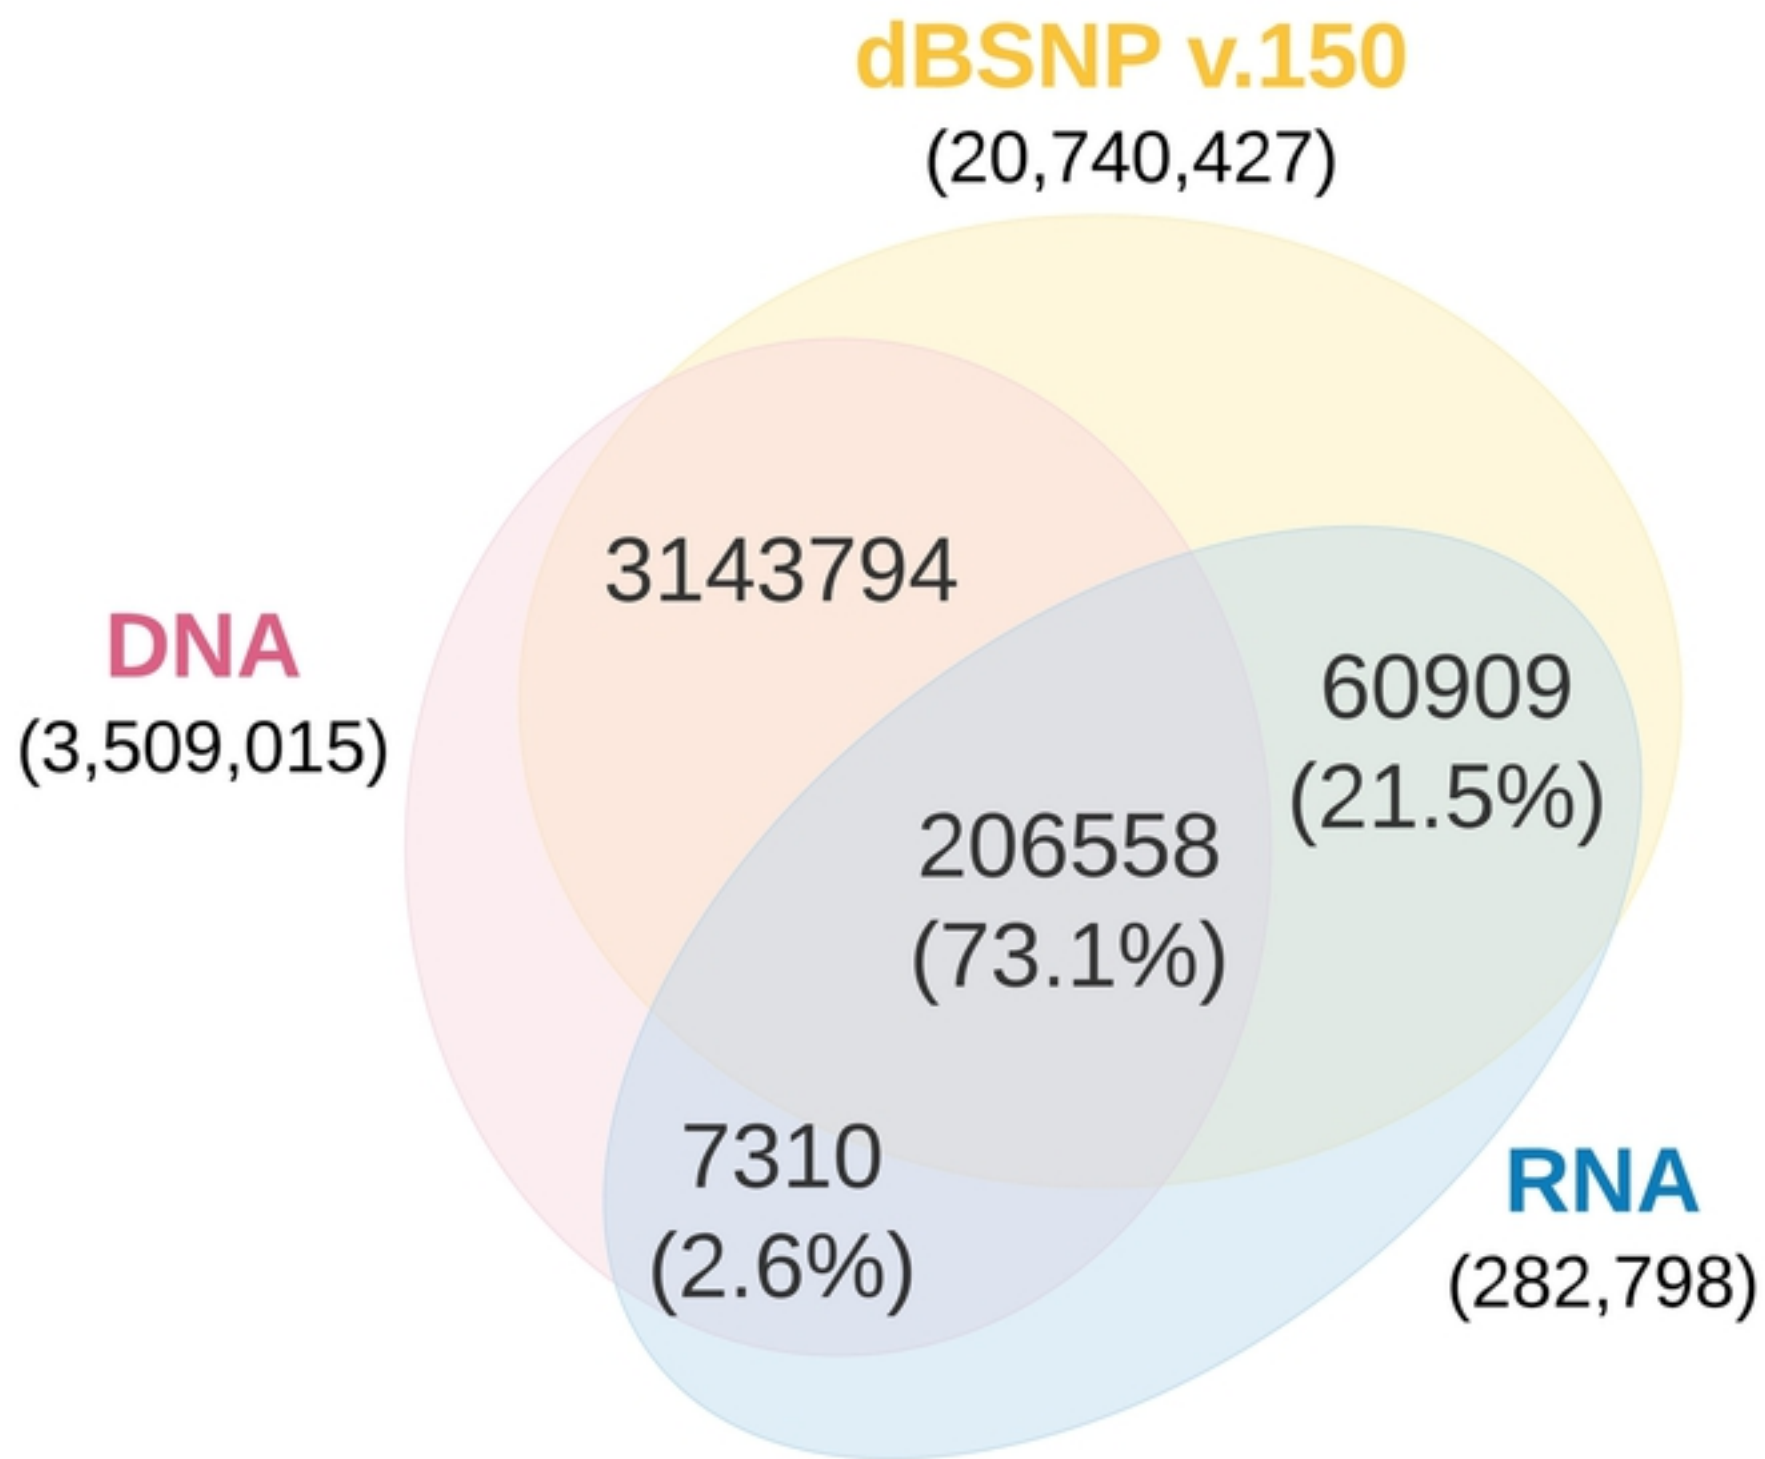

Fig 3

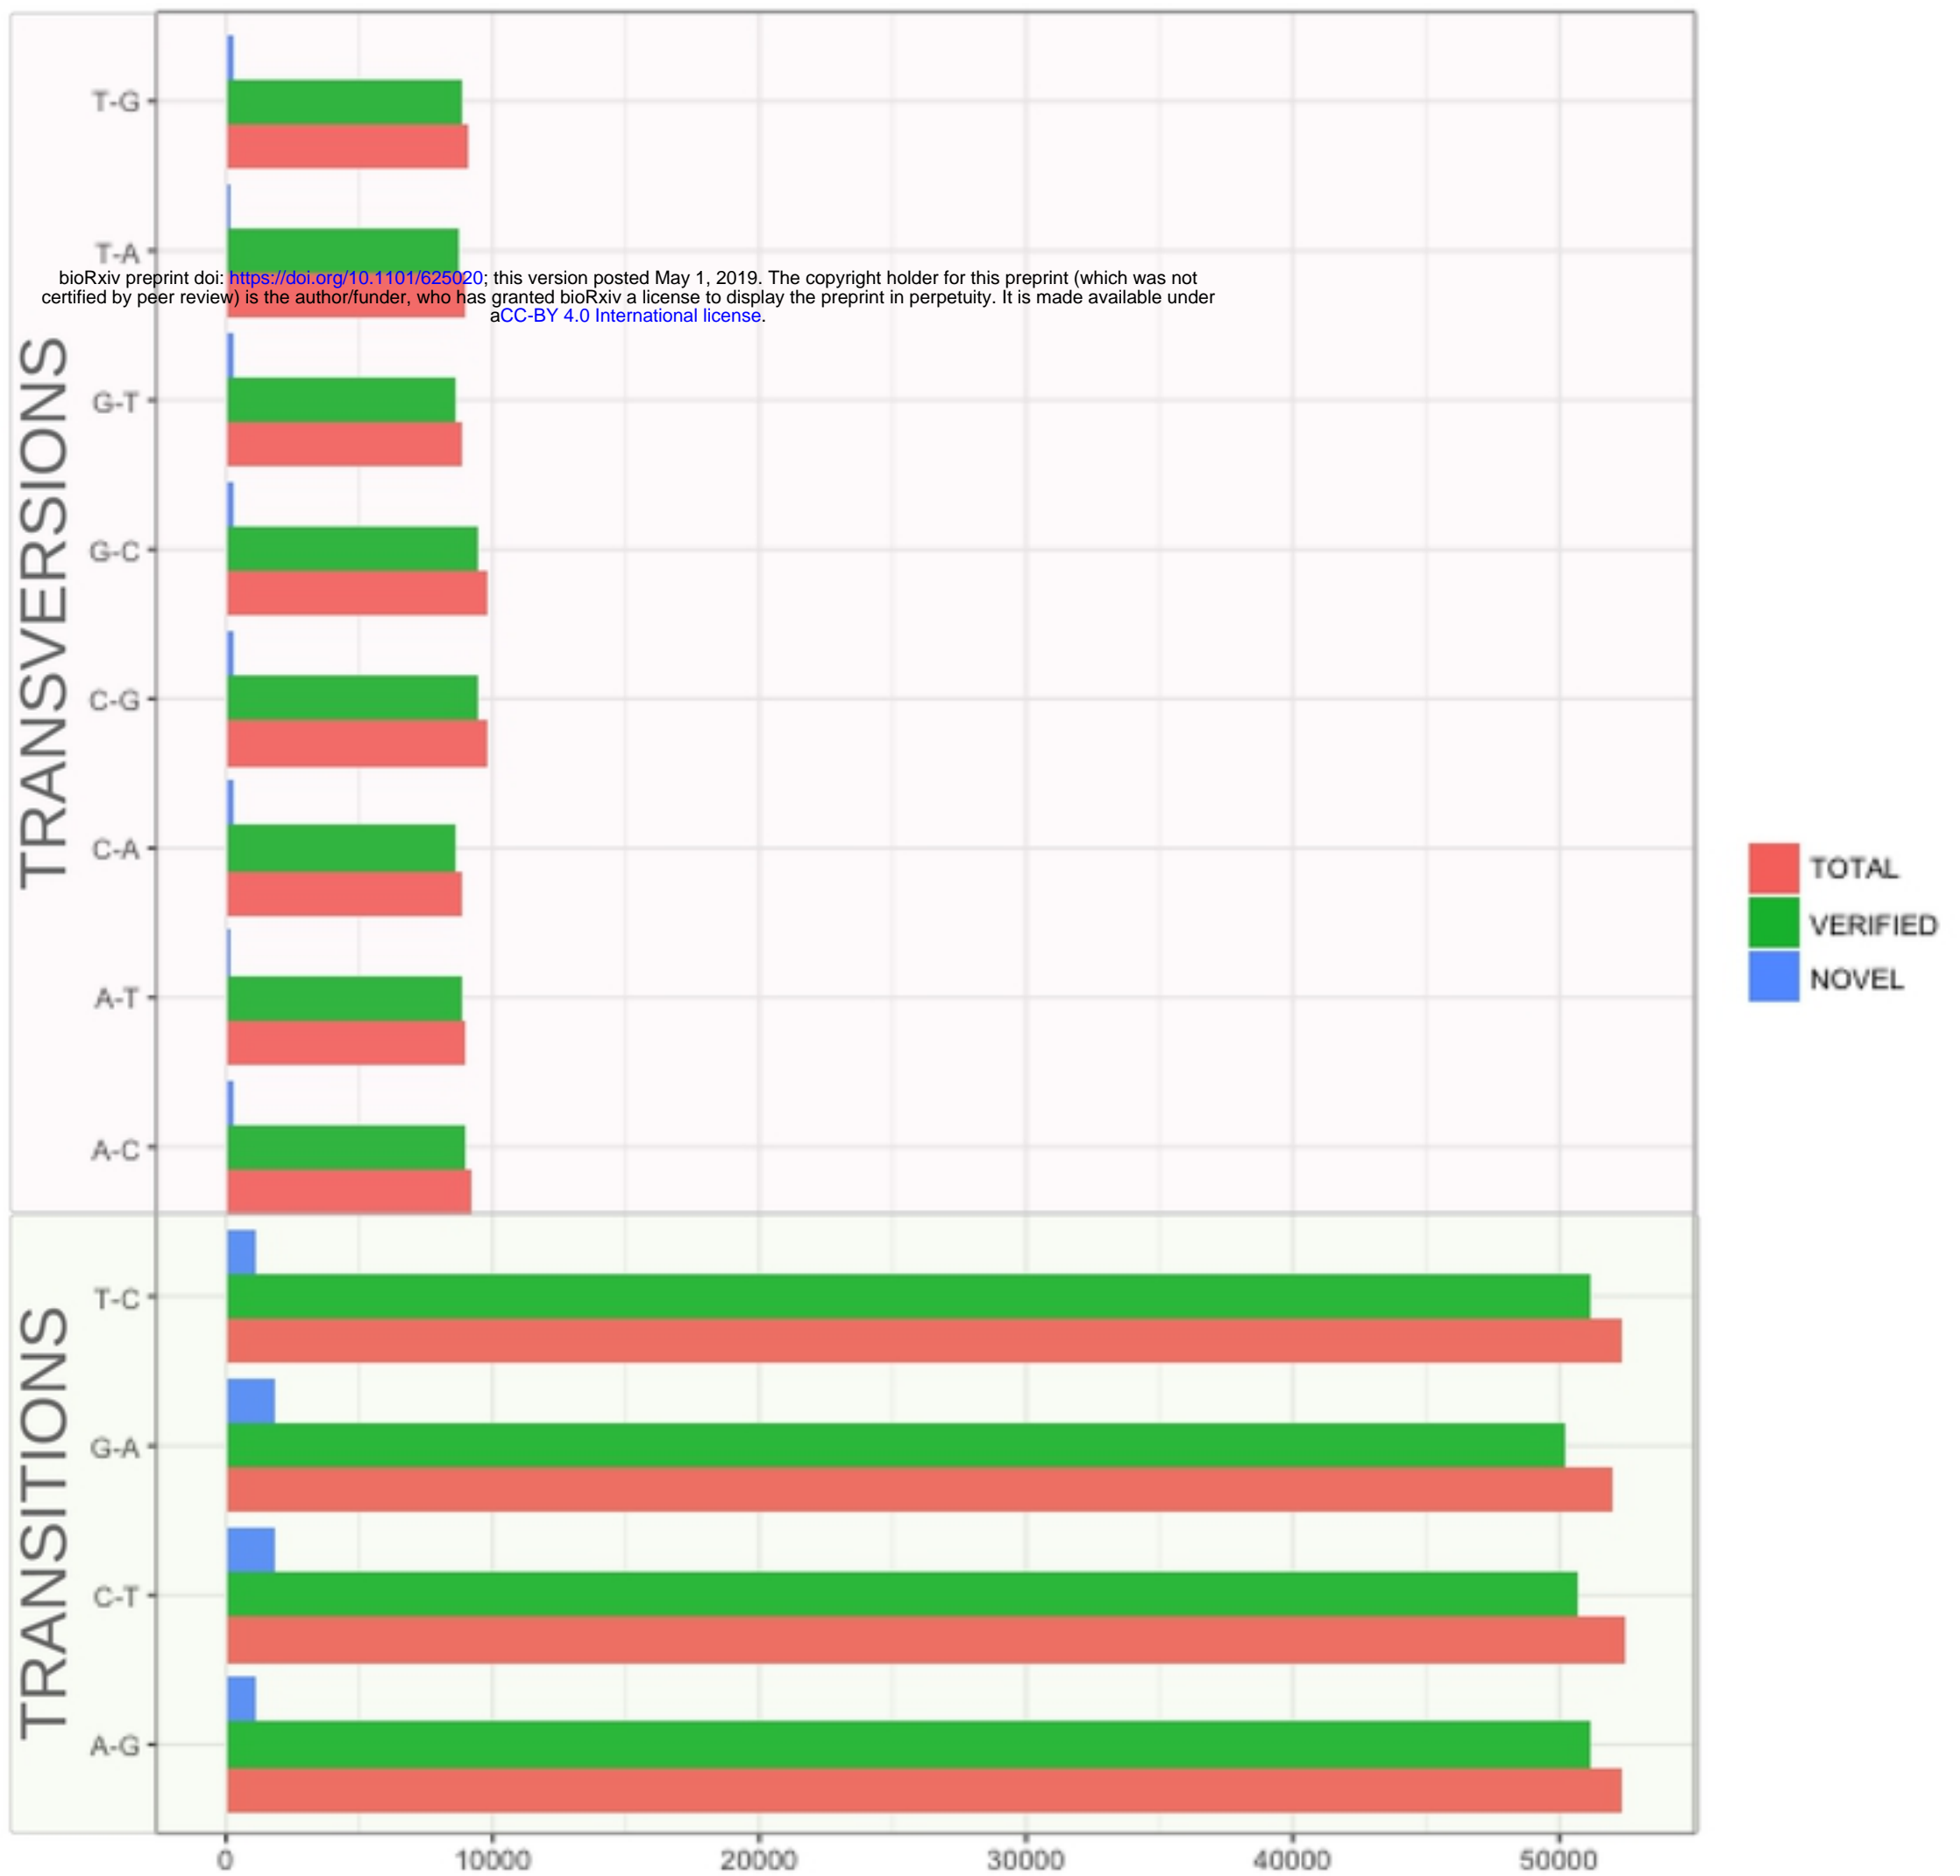

Fig 4

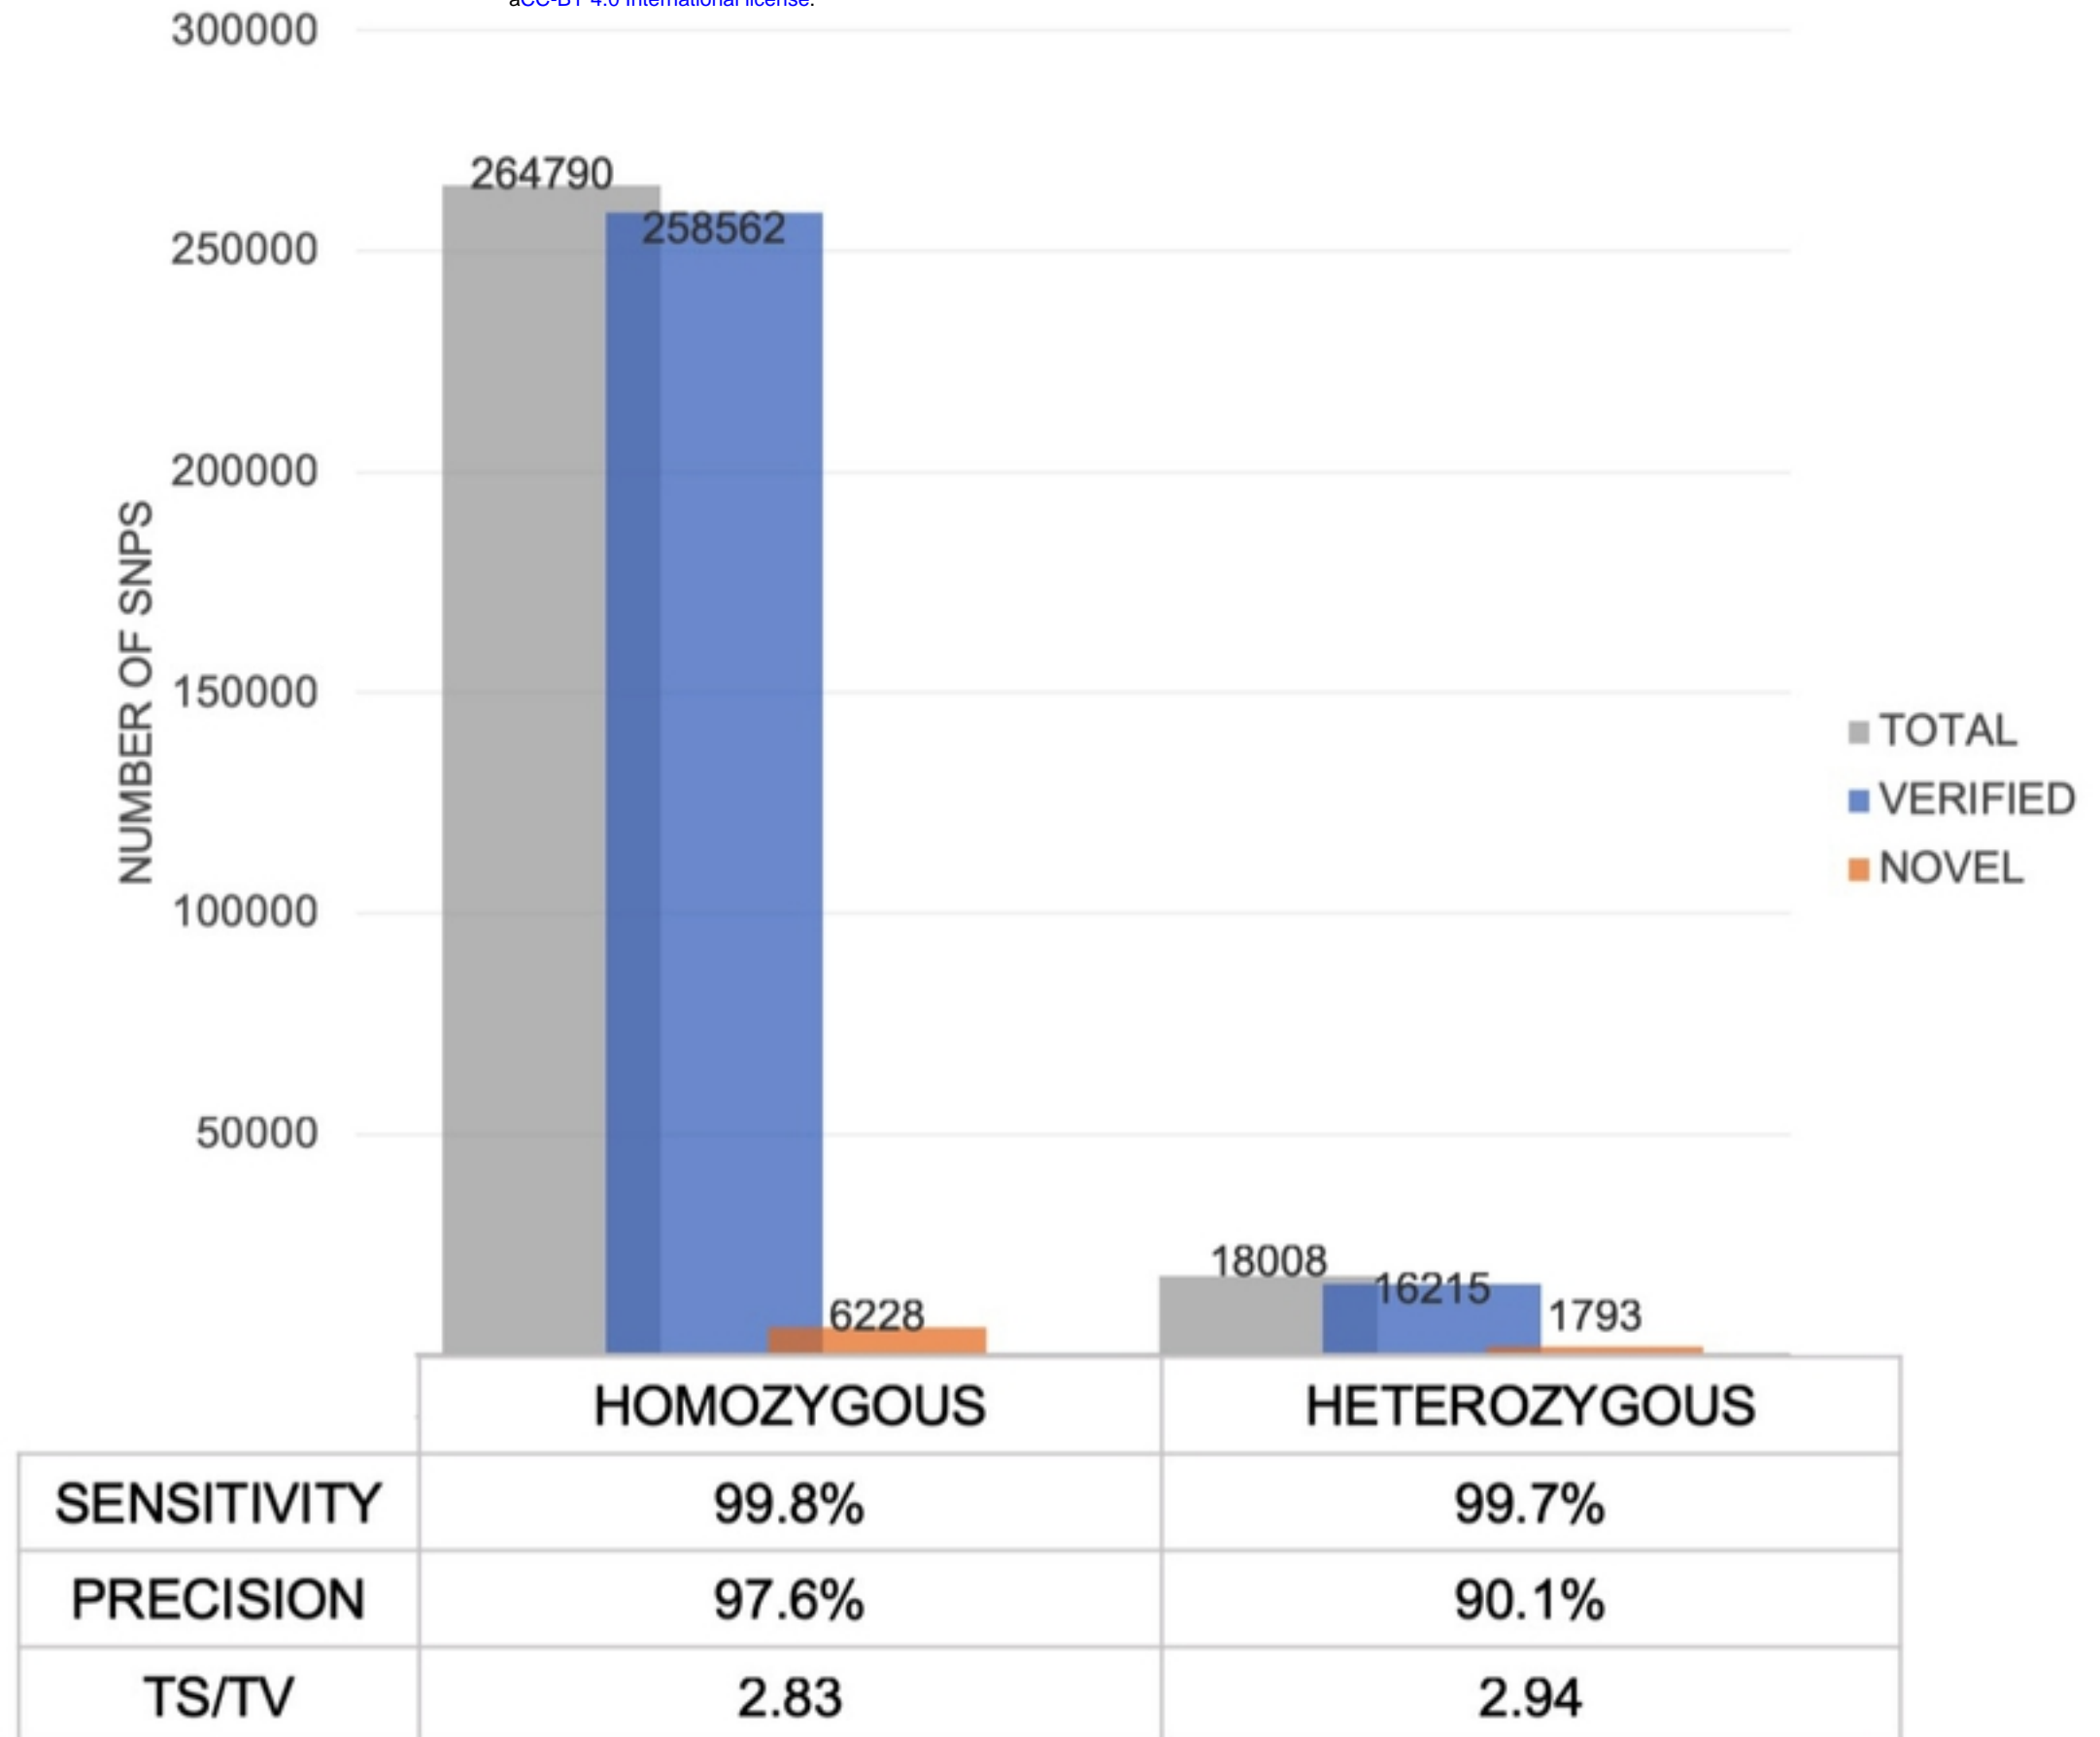

Fig 5

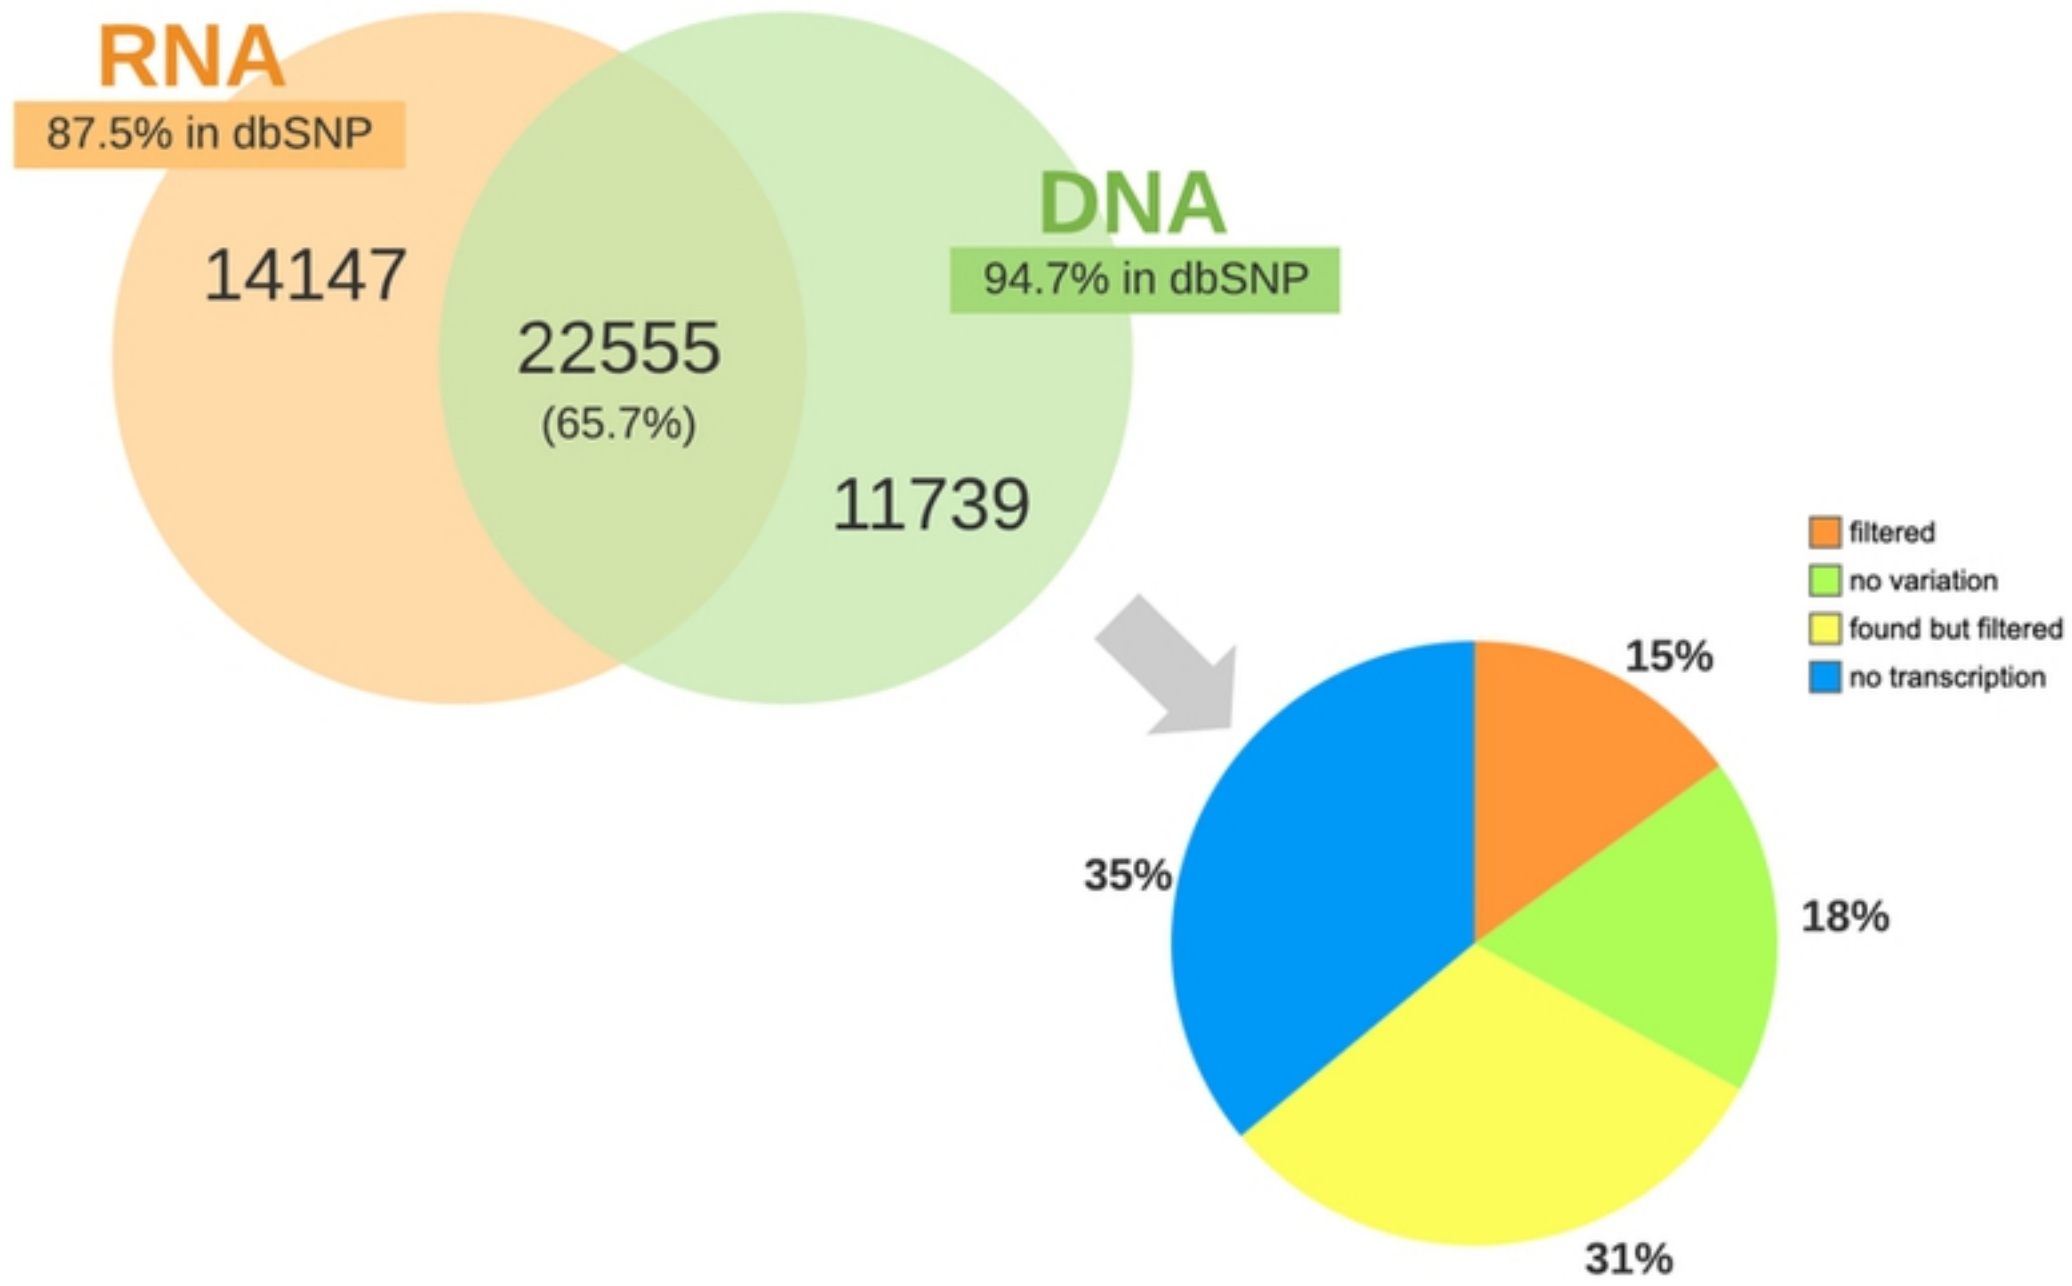

Fig 6

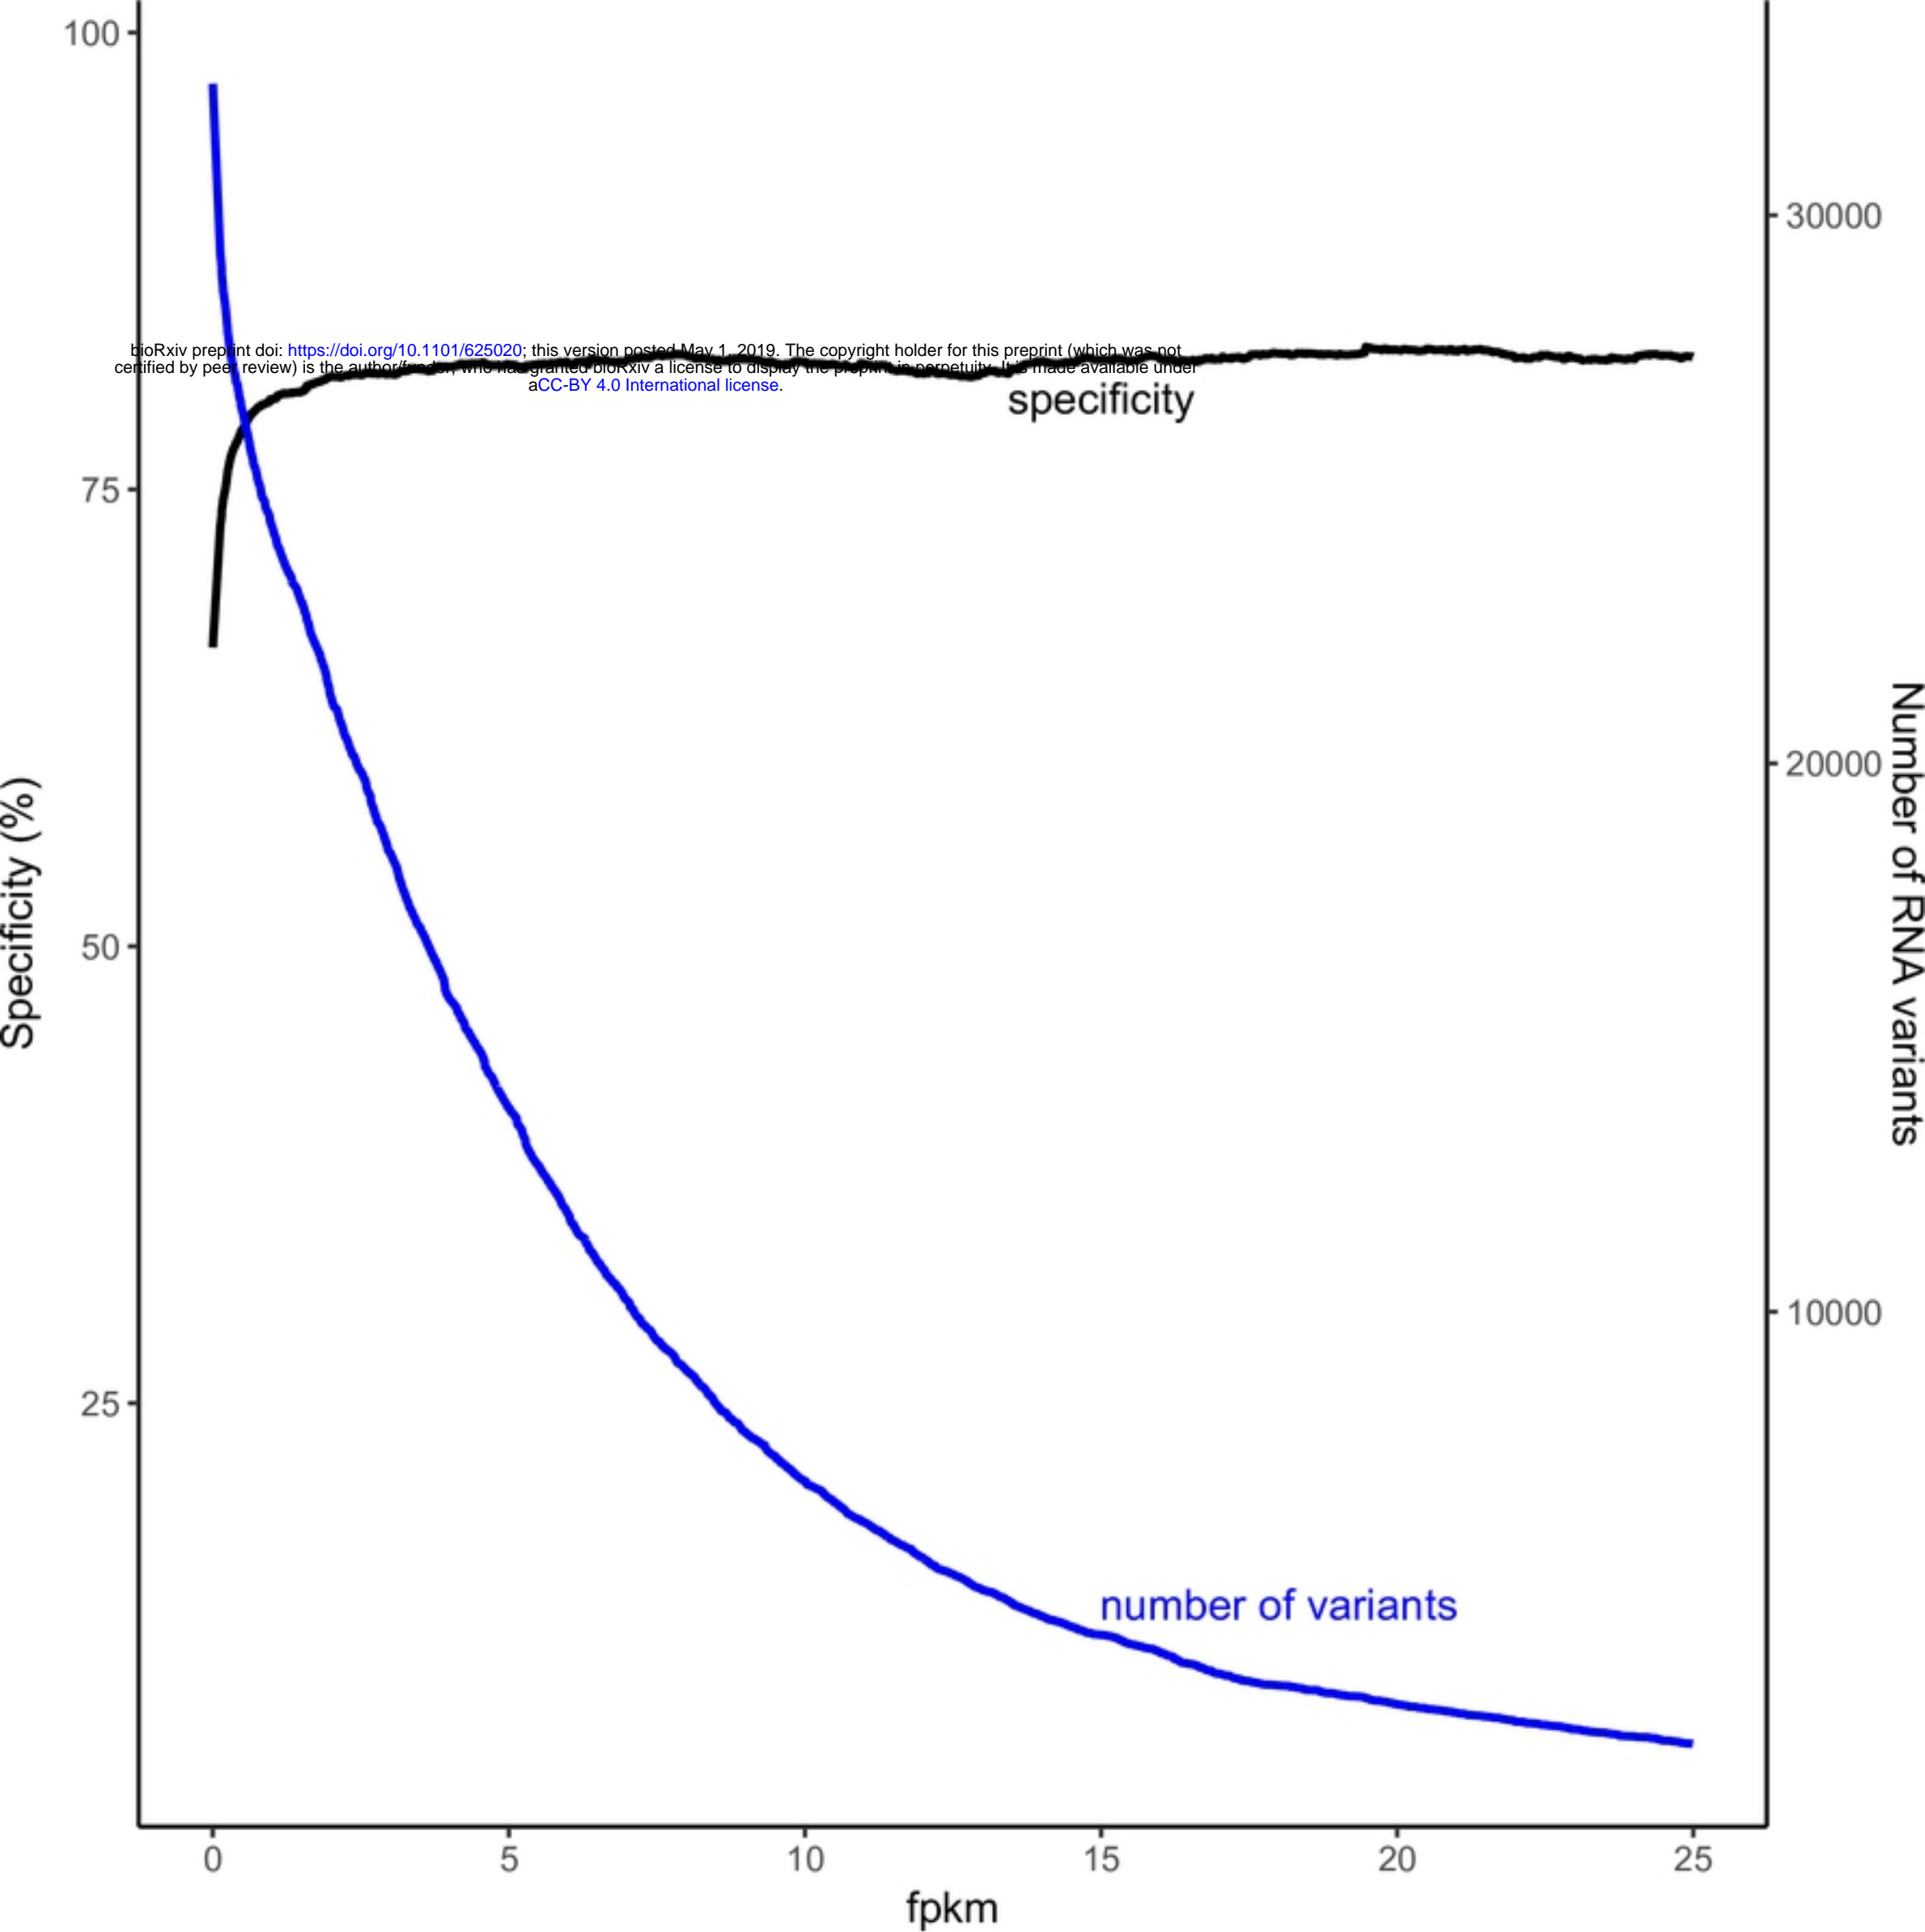

Fig 7

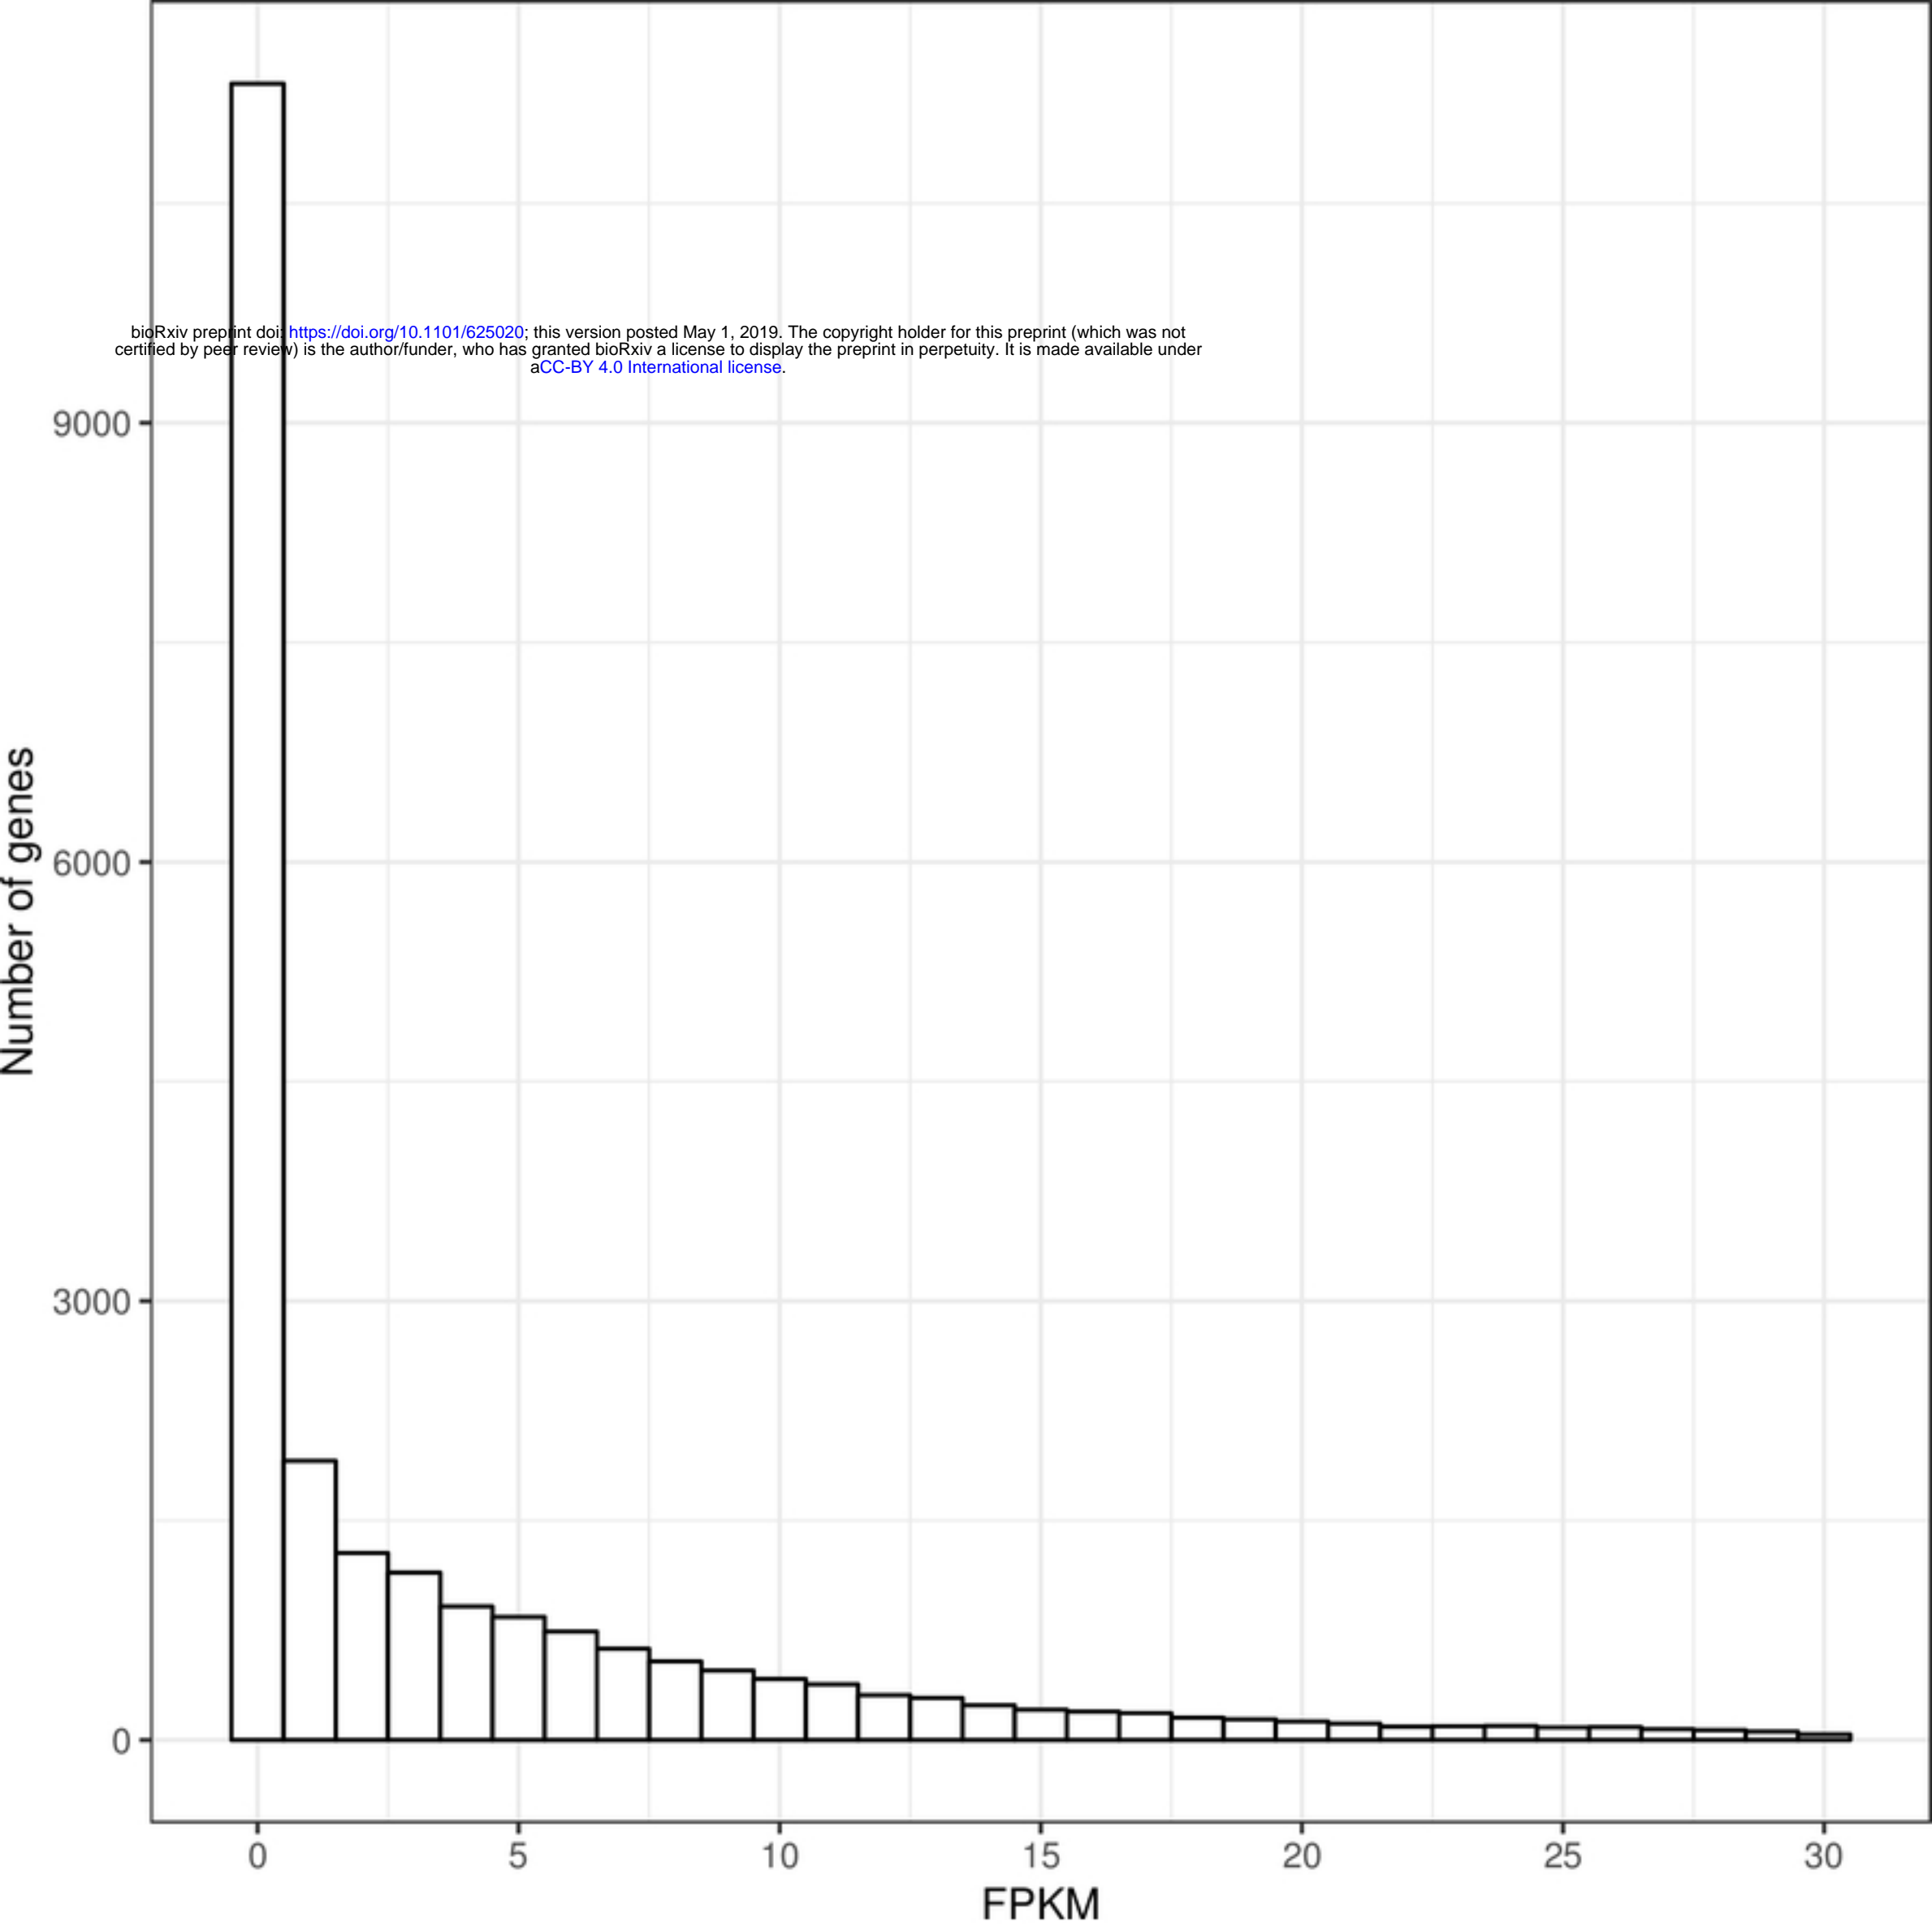

Fig 8



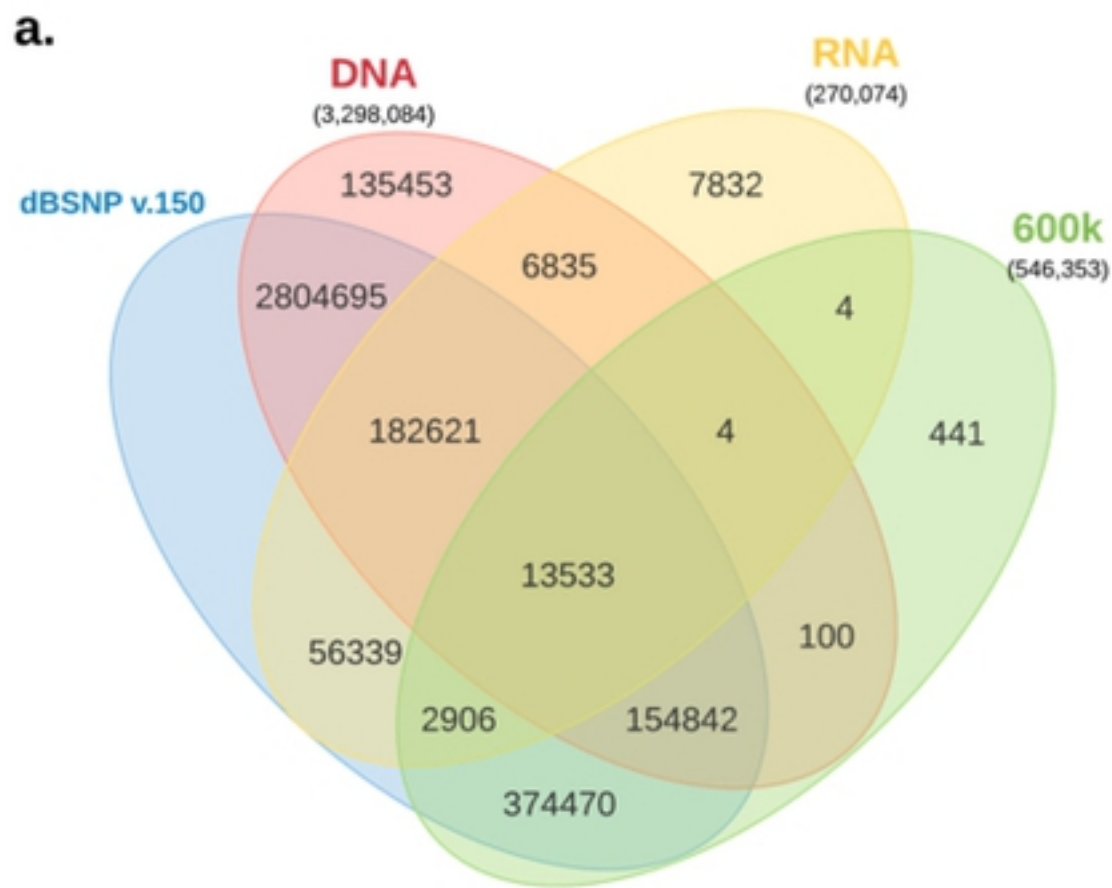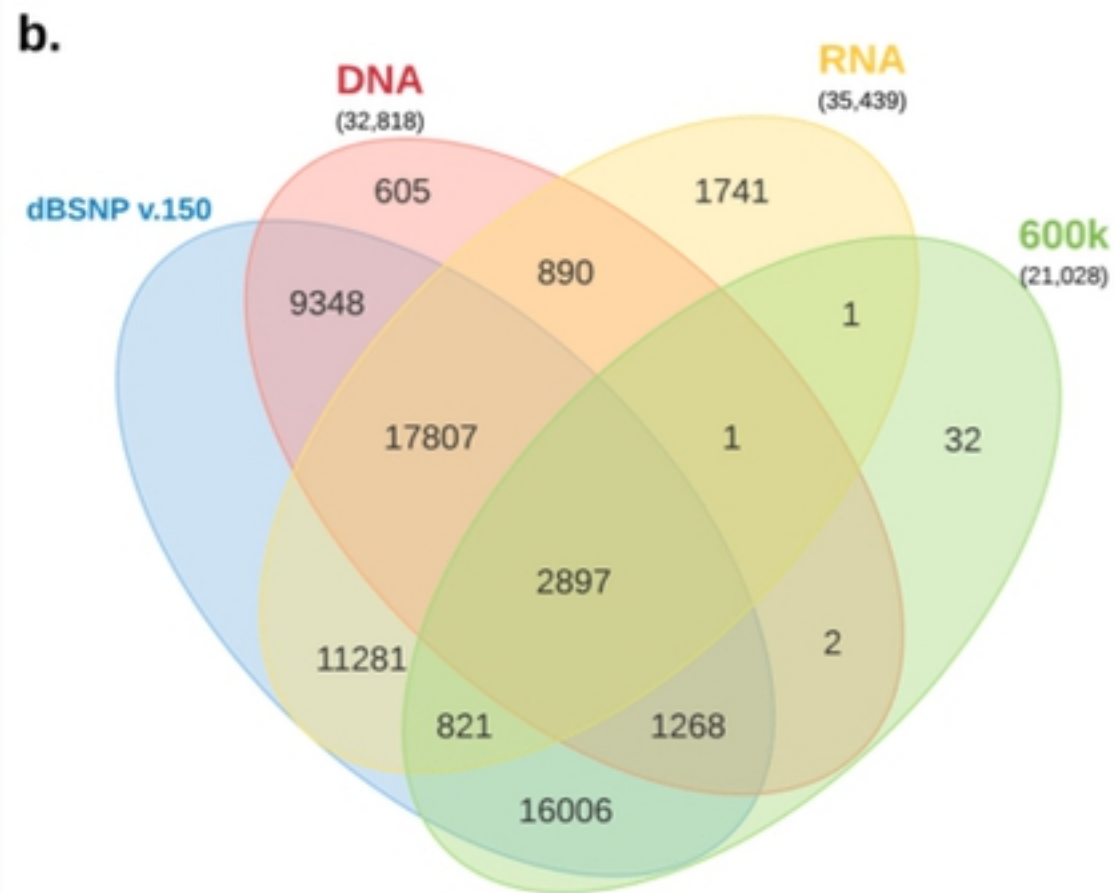

Fig 9
